# Supplementary material for: Impact of Host Plant Species and Whitefly Species on Feeding Behavior of Bemisia tabaci
Source: Front Plant Sci. 2019 Jan 22;10:1. doi: 10.3389/fpls.2019.00001 (PMC6349738; doi:10.3389/fpls.2019.00001)
Supplement: Supplementary file 1 [file Table_1.XLSX]

## Sheet: EPG-AllTypes-AllHosts
Supplementary Table S1 - EPG parameters
Treatment	Parameter	N	Minimum	Maximum	Mean	Tukey group	Standard deviation	Transformed mean	Lower	Upper	λ	BoxCox(Arcsine(x))
Cassava-SSA1_SG3	Contribution of E1 to phloem phase	40	0.0509899	100	8.14104	d	22.8501	0.676922	0.4823	0.8715	-0.4
SweetPotato-SSA1_SG3	Contribution of E1 to phloem phase	15	0.0994698	18.1846	2.63153	d	4.58645	0.702623	0.4693	0.936	-0.4
Tomato-SSA1_SG3	Contribution of E1 to phloem phase	15	1.45132	30.2067	10.6008	bc	10.0407	1.34869	1.1477	1.5496	-0.4
Cotton-SSA1_SG3	Contribution of E1 to phloem phase	14	0.100469	50.4522	5.89521	cd	13.1524	0.815013	0.5132	1.1168	-0.4
Cassava-MED	Contribution of E1 to phloem phase	27	0.233955	100	48.4916	ab	40.9638	1.72194	1.5346	1.9093	-0.4
SweetPotato-MED	Contribution of E1 to phloem phase	15	0.123496	3.94262	1.72617	d	1.13871	0.737936	0.5703	0.9056	-0.4
Cassava-IO	Contribution of E1 to phloem phase	5	9.51007	100	51.5231	a	44.9978	1.86305	1.6376	2.0885	-0.4
SweetPotato-IO	Contribution of E1 to phloem phase	9	0.0992079	11.9619	3.49039	cd	3.93963	0.875558	0.5484	1.2028	-0.4
Cassava-SSA1_SG3	Number of probes to first E1	40	2	30	9.05	a	6.83111	2.11062	1.9159	2.3053	0
SweetPotato-SSA1_SG3	Number of probes to first E1	15	1	45	17.4	a	10.8087	2.71551	2.3396	3.0914	0
Tomato-SSA1_SG3	Number of probes to first E1	15	2	22	9.06667	a	5.24359	2.17779	1.898	2.4576	0
Cotton-SSA1_SG3	Number of probes to first E1	14	4	23	11.7857	a	6.12911	2.43484	2.1669	2.7028	0
Cassava-MED	Number of probes to first E1	27	4	32	13.963	a	9.54133	2.50428	2.2557	2.7528	0
SweetPotato-MED	Number of probes to first E1	15	1	51	14.0667	a	12.2034	2.45439	2.0638	2.8449	0
Cassava-IO	Number of probes to first E1	5	3	37	19.8	a	15.0897	2.74301	1.9152	3.5709	0
SweetPotato-IO	Number of probes to first E1	9	4	18	9.44444	a	4.8247	2.25054	1.9432	2.5579	0
Cassava-SSA1_SG3	Number of probes to first G	22	1	20	7.09091	a	5.72305	1.67574	1.4269	1.9246	-0.1
SweetPotato-SSA1_SG3	Number of probes to first G	11	2	26	8.54545	a	7.3941	1.82993	1.5133	2.1466	-0.1
Tomato-SSA1_SG3	Number of probes to first G	12	2	23	9	a	6.90191	1.88704	1.5924	2.1817	-0.1
Cotton-SSA1_SG3	Number of probes to first G	8	2	12	8	a	3.20713	1.90188	1.6287	2.1751	-0.1
Cassava-MED	Number of probes to first G	28	1	40	10.9286	a	10.8215	1.87439	1.6112	2.1376	-0.1
SweetPotato-MED	Number of probes to first G	6	4	21	11.3333	a	7.20185	2.08144	1.6711	2.4918	-0.1
Cassava-IO	Number of probes to first G	5	1	16	9.8	a	7.25948	1.84363	1.1153	2.572	-0.1
SweetPotato-IO	Number of probes to first G	1	5	5	5	a		1.64041	1.6404	1.6404	-0.1
Cassava-SSA1_SG3	Duration of E1 followed by first sustained E2	38	13.69	285.36	40.3542	b	46.1079	1.22957	1.2189	1.2402	-0.75
SweetPotato-SSA1_SG3	Duration of E1 followed by first sustained E2	15	25.58	399.38	100.467	a	107.652	1.26571	1.248	1.2835	-0.75
Tomato-SSA1_SG3	Duration of E1 followed by first sustained E2	15	33.36	1634.72	169.561	a	406.738	1.27146	1.2586	1.2844	-0.75
Cotton-SSA1_SG3	Duration of E1 followed by first sustained E2	14	23.47	595.55	84.9136	ab	148.431	1.2548	1.2385	1.2711	-0.75
Cassava-MED	Duration of E1 followed by first sustained E2	18	23.82	735.86	92.9578	a	165.296	1.25845	1.2441	1.2728	-0.75
SweetPotato-MED	Duration of E1 followed by first sustained E2	15	25.42	132.5	58.524	a	28.5644	1.2626	1.2505	1.2748	-0.75
Cassava-IO	Duration of E1 followed by first sustained E2	3	29.9	49.23	36.6333	ab	10.9177	1.24265	1.2228	1.2625	-0.75
SweetPotato-IO	Duration of E1 followed by first sustained E2	9	16.65	175.08	48.8122	ab	48.245	1.24099	1.218	1.264	-0.75
Cassava-SSA1_SG3	Duration of E1 followed by first sustained E2 (Long E2)	36	13.8	213.81	42.4597	b	37.8353	1.30473	1.2918	1.3176	-0.7
SweetPotato-SSA1_SG3	Duration of E1 followed by first sustained E2 (Long E2)	15	27.21	399.38	103.057	a	104.487	1.34628	1.3258	1.3667	-0.7
Tomato-SSA1_SG3	Duration of E1 followed by first sustained E2 (Long E2)	14	33.36	1634.72	177.801	a	420.774	1.34846	1.3315	1.3654	-0.7
Cotton-SSA1_SG3	Duration of E1 followed by first sustained E2 (Long E2)	14	23.47	595.55	106.839	ab	167.506	1.33007	1.3079	1.3522	-0.7
Cassava-MED	Duration of E1 followed by first sustained E2 (Long E2)	14	23.82	213.07	75.3736	ab	70.8872	1.33424	1.3145	1.354	-0.7
SweetPotato-MED	Duration of E1 followed by first sustained E2 (Long E2)	15	25.42	126.55	60.8353	a	26.3524	1.34044	1.3265	1.3544	-0.7
Cassava-IO	Duration of E1 followed by first sustained E2 (Long E2)	3	30.77	49.2	38.19	ab	9.72534	1.3165	1.296	1.337	-0.7
SweetPotato-IO	Duration of E1 followed by first sustained E2 (Long E2)	9	16.65	120.72	42.1256	ab	30.6063	1.30864	1.2831	1.3342	-0.7
Cassava-SSA1_SG3	Duration of first E (E1 + E2)	40	15.67	37371.2	7856.97	bc	12946	6.12296	5.2085	7.0375	0
SweetPotato-SSA1_SG3	Duration of first E (E1 + E2)	15	45.81	33668.5	8186.45	a	9096.9	8.23041	7.3917	9.0692	0
Tomato-SSA1_SG3	Duration of first E (E1 + E2)	15	114.43	8916.73	2739.06	ab	2816.21	7.31014	6.6523	7.968	0
Cotton-SSA1_SG3	Duration of first E (E1 + E2)	14	20.71	27929.1	5718.18	ac	8701.47	7.03944	5.8111	8.2677	0
Cassava-MED	Duration of first E (E1 + E2)	27	11.58	16124.1	1031.52	c	3085.72	5.1446	4.4287	5.8605	0
SweetPotato-MED	Duration of first E (E1 + E2)	15	107.15	33588.2	6952.88	ab	9948.37	7.59894	6.638	8.5599	0
Cassava-IO	Duration of first E (E1 + E2)	5	73.03	759.24	276.256	c	279.603	5.27277	4.4663	6.0792	0
SweetPotato-IO	Duration of first E (E1 + E2)	9	88.05	38958.6	6432.99	ac	12538.2	7.26239	5.9689	8.5559	0
Cassava-SSA1_SG3	Duration of First Probe	40	3.11	10358.9	949.085	a	1880.82	4.79109	4.3585	5.2237	-0.05
SweetPotato-SSA1_SG3	Duration of First Probe	15	6.64	15758.5	1527.79	a	4045.85	4.63237	3.8517	5.413	-0.05
Tomato-SSA1_SG3	Duration of First Probe	15	33.64	4084.1	544.4	a	1124.24	4.47992	3.9455	5.0143	-0.05
Cotton-SSA1_SG3	Duration of First Probe	14	21.59	9098.11	1619.83	a	2731.75	5.10837	4.3792	5.8375	-0.05
Cassava-MED	Duration of First Probe	28	9	8737.23	786.241	a	1873.03	4.46944	3.9815	4.9574	-0.05
SweetPotato-MED	Duration of First Probe	15	40.93	4163.68	597.553	a	1041	4.8639	4.4029	5.3249	-0.05
Cassava-IO	Duration of First Probe	5	72.63	2205.84	658.962	a	924.401	4.80675	3.7761	5.8374	-0.05
SweetPotato-IO	Duration of First Probe	9	39	1010.99	309.527	a	319.686	4.60852	4.0682	5.1488	-0.05
Cassava-SSA1_SG3	Total Time spent in G waveform	40	0	23888.4	3233.23	bc	5619.47	9.0029	6.2965	11.7093	0.15
SweetPotato-SSA1_SG3	Total Time spent in G waveform	15	0	13077.5	4934.21	ac	4545.95	12.8881	8.5811	17.195	0.15
Tomato-SSA1_SG3	Total Time spent in G waveform	15	0	13952.2	4699.97	ab	4563.87	13.6543	9.8484	17.4602	0.15
Cotton-SSA1_SG3	Total Time spent in G waveform	14	0	25705.9	3581.38	abd	6871.58	9.28786	4.6058	13.9699	0.15
Cassava-MED	Total Time spent in G waveform	28	423.08	17314.4	3832.41	a	4000.98	14.9858	13.7467	16.2249	0.15
SweetPotato-MED	Total Time spent in G waveform	15	0	6248.44	733.213	cd	1609.22	5.13252	1.7012	8.5638	0.15
Cassava-IO	Total Time spent in G waveform	5	1810	7608.62	3348.61	a	2473.06	15.3631	13.5049	17.2213	0.15
SweetPotato-IO	Total Time spent in G waveform	9	0	4357.72	484.191	d	1452.57	1.86283	-1.8218	5.5474	0.15
Cassava-SSA1_SG3	Duration of nonprobe period before first E1	40	107.12	11713	2590.43	bc	2613.47	11.0379	10.3537	11.7222	0.1
SweetPotato-SSA1_SG3	Duration of nonprobe period before first E1	15	201.17	7438.67	3750.33	ab	2164.91	12.2702	11.2975	13.2428	0.1
Tomato-SSA1_SG3	Duration of nonprobe period before first E1	15	196.09	30870.6	9726.75	a	8318.22	13.8531	12.254	15.4521	0.1
Cotton-SSA1_SG3	Duration of nonprobe period before first E1	14	172.48	9249.58	3468.28	ac	2915.25	11.7438	10.5072	12.9804	0.1
Cassava-MED	Duration of nonprobe period before first E1	28	418.15	20119.2	4714.48	ab	4481.59	12.406	11.5657	13.2462	0.1
SweetPotato-MED	Duration of nonprobe period before first E1	15	230.27	18755.8	3411.11	ac	4582.47	11.461	10.265	12.6569	0.1
Cassava-IO	Duration of nonprobe period before first E1	5	510.22	11059.2	4103.15	ac	4279.17	11.9797	9.6847	14.2748	0.1
SweetPotato-IO	Duration of nonprobe period before first E1	9	283.08	1565.3	922.031	c	434.723	9.57896	8.8672	10.2908	0.1
Cassava-SSA1_SG3	Duration of nonprobe period before first G	22	256.46	11713	2572.33	b	2715.87	7.43394	7.0364	7.8315	0
SweetPotato-SSA1_SG3	Duration of nonprobe period before first G	11	225.13	5085.52	2319.94	b	1511.81	7.46469	6.9159	8.0134	0
Tomato-SSA1_SG3	Duration of nonprobe period before first G	12	920.83	30870.6	10784.5	a	7180.46	9.05756	8.5857	9.5295	0
Cotton-SSA1_SG3	Duration of nonprobe period before first G	8	320.95	14071.3	4366.64	abc	5143.95	7.58903	6.5801	8.598	0
Cassava-MED	Duration of nonprobe period before first G	28	166	19133.4	3645.82	b	4378.21	7.56057	7.1066	8.0146	0
SweetPotato-MED	Duration of nonprobe period before first G	6	328.09	9991.18	2612.11	bc	3678.17	7.22607	6.2653	8.1868	0
Cassava-IO	Duration of nonprobe period before first G	5	170.04	5772	2988.41	abc	2592.93	7.43127	6.1348	8.7277	0
SweetPotato-IO	Duration of nonprobe period before first G	1	456.24	456.24	456.24	c		6.12521			0
Cassava-SSA1_SG3	Duration of NP following first sustained E2	18	60.58	6322.6	512.679	a	1453.95	2.15661	2.1036	2.2097	-0.4
SweetPotato-SSA1_SG3	Duration of NP following first sustained E2	11	46.26	503.18	169.275	a	129.253	2.13992	2.0838	2.1961	-0.4
Tomato-SSA1_SG3	Duration of NP following first sustained E2	14	50.34	3434.62	665.591	a	1009.07	2.19493	2.1209	2.2689	-0.4
Cotton-SSA1_SG3	Duration of NP following first sustained E2	10	35.01	463.19	165.406	a	166.79	2.08569	1.9938	2.1776	-0.4
Cassava-MED	Duration of NP following first sustained E2	13	50	566.48	233.982	a	159.914	2.17415	2.116	2.2323	-0.4
SweetPotato-MED	Duration of NP following first sustained E2	13	25.53	3780.73	632.613	a	1258.03	2.13454	2.0438	2.2252	-0.4
Cassava-IO	Duration of NP following first sustained E2	3	35.46	3552.25	1222.6	a	2017.66	2.12697	1.8351	2.4188	-0.4
SweetPotato-IO	Duration of NP following first sustained E2	8	47.85	307.11	138.116	a	80.3676	2.12396	2.0623	2.1856	-0.4
Cassava-SSA1_SG3	Duration of Second Probe	40	13.6	16140.1	1668.14	a	4093.58	4.12735	3.8172	4.4375	-0.1
SweetPotato-SSA1_SG3	Duration of Second Probe	15	15.58	3324.83	709.144	ab	1128.94	3.943	3.3795	4.5065	-0.1
Tomato-SSA1_SG3	Duration of Second Probe	15	23.76	10906	1179.9	a	2779.07	4.25516	3.7858	4.7245	-0.1
Cotton-SSA1_SG3	Duration of Second Probe	14	11.63	7004.93	1312.68	a	2006.34	4.45716	3.931	4.9833	-0.1
Cassava-MED	Duration of Second Probe	28	3	13358.8	1178.33	a	2623.65	4.27016	3.8863	4.654	-0.1
SweetPotato-MED	Duration of Second Probe	15	17.4	475.71	100.521	b	120.058	3.36892	3.0505	3.6873	-0.1
Cassava-IO	Duration of Second Probe	5	10	194	104.698	ab	69.6973	3.46965	2.7753	4.164	-0.1
SweetPotato-IO	Duration of Second Probe	9	9	447.86	184.399	ab	161.718	3.66617	3.0916	4.2408	-0.1
Cassava-SSA1_SG3	Duration of second non-probe event (z or np)	40	3.12	1241.01	278.132	a	310.355	5.02408	4.6251	5.4231	0
SweetPotato-SSA1_SG3	Duration of second non-probe event (z or np)	15	21.13	1592.1	339.554	a	398.128	5.20138	4.5461	5.8566	0
Tomato-SSA1_SG3	Duration of second non-probe event (z or np)	15	11.49	1088.82	312.972	a	354.849	4.95581	4.1933	5.7183	0
Cotton-SSA1_SG3	Duration of second non-probe event (z or np)	14	19.52	2786.87	483.429	a	931.401	4.91516	4.1285	5.7019	0
Cassava-MED	Duration of second non-probe event (z or np)	28	22	11035.6	715.801	a	2081.09	5.16418	4.6039	5.7244	0
SweetPotato-MED	Duration of second non-probe event (z or np)	15	18.16	1090.74	198.125	a	273.054	4.65674	4.0676	5.2458	0
Cassava-IO	Duration of second non-probe event (z or np)	5	47	232.29	148.542	a	78.7717	4.8566	4.2689	5.4443	0
SweetPotato-IO	Duration of second non-probe event (z or np)	9	5.21	624.58	161.398	a	190.34	4.41942	3.5013	5.3375	0
Cassava-SSA1_SG3	Median duration of probes	40	38.92	13606.5	980.007	ab	2171.86	3.44762	3.3321	3.5631	-0.2
SweetPotato-SSA1_SG3	Median duration of probes	15	32.6	1214.78	217.353	c	290.897	3.08982	2.9052	3.2745	-0.2
Tomato-SSA1_SG3	Median duration of probes	15	78.33	825.42	244.762	bc	231.232	3.21468	3.0862	3.3432	-0.2
Cotton-SSA1_SG3	Median duration of probes	14	56.92	1785.05	512.872	ac	539.346	3.39319	3.2277	3.5587	-0.2
Cassava-MED	Median duration of probes	28	130.22	2578.97	545.673	a	541.048	3.4738	3.3908	3.5568	-0.2
SweetPotato-MED	Median duration of probes	15	90.255	460.89	249.027	ac	125.045	3.29303	3.2016	3.3844	-0.2
Cassava-IO	Median duration of probes	5	180	1733.2	584.396	ac	657.773	3.46611	3.233	3.6992	-0.2
SweetPotato-IO	Median duration of probes	9	108.96	353.69	223.297	ac	84.6405	3.27604	3.1786	3.3735	-0.2
Cassava-SSA1_SG3	Mean duration of G	22	302.08	7962.81	2219.63	ab	1762.76	5.22399	5.0598	5.3882	-0.1
SweetPotato-SSA1_SG3	Mean duration of G	11	780.35	13077.5	3663.38	ab	3681.81	5.40565	5.1574	5.6539	-0.1
Tomato-SSA1_SG3	Mean duration of G	12	1000.9	6976.12	3455.86	a	2060.02	5.48222	5.3114	5.653	-0.1
Cotton-SSA1_SG3	Mean duration of G	8	858.93	6426.47	2381.57	ab	1926.85	5.28542	5.0573	5.5136	-0.1
Cassava-MED	Mean duration of G	28	222.335	2885.73	912.343	c	680.095	4.81138	4.6795	4.9433	-0.1
SweetPotato-MED	Mean duration of G	6	569.55	3124.22	1187.64	bc	989.332	4.96099	4.7035	5.2185	-0.1
Cassava-IO	Mean duration of G	5	452.5	1521.72	921.314	bc	400.698	4.90326	4.6976	5.1089	-0.1
SweetPotato-IO	Mean duration of G	1	1452.57	1452.57	1452.57	b		5.17212			-0.1
Cassava-SSA1_SG3	Mean duration of C	40	253.6	1219.01	617.872	a	238.002	10.6527	10.3311	10.9743	0.15
SweetPotato-SSA1_SG3	Mean duration of C	15	109.654	570.521	226.553	d	109.965	8.21999	7.7493	8.6907	0.15
Tomato-SSA1_SG3	Mean duration of C	15	216.39	631.626	336.977	c	112.929	9.21042	8.8434	9.5774	0.15
Cotton-SSA1_SG3	Mean duration of C	14	222.765	674.3	415.963	bc	123.97	9.72432	9.33	10.1186	0.15
Cassava-MED	Mean duration of C	28	257.065	871.363	534.481	ab	157.415	10.3493	10.0625	10.6362	0.15
SweetPotato-MED	Mean duration of C	15	197.418	822.476	365.933	c	159.565	9.34774	8.8705	9.825	0.15
Cassava-IO	Mean duration of C	5	318.49	575.466	480.93	ac	117.896	10.1167	9.5296	10.7039	0.15
SweetPotato-IO	Mean duration of C	9	217.738	906.2	374.431	bcd	214.637	9.33934	8.6103	10.0683	0.15
Cassava-SSA1_SG3	Mean Duration of E1	40	18.47	633.46	65.5554	b	106.902	1.68477	1.6581	1.7115	-0.5
SweetPotato-SSA1_SG3	Mean Duration of E1	15	33.49	238.325	89.5147	ab	67.5028	1.75304	1.7153	1.7908	-0.5
Tomato-SSA1_SG3	Mean Duration of E1	15	29.915	197.961	91.1158	a	51.909	1.76866	1.7363	1.801	-0.5
Cotton-SSA1_SG3	Mean Duration of E1	14	27.815	417.45	92.2511	ab	118.673	1.72669	1.6817	1.7717	-0.5
Cassava-MED	Mean Duration of E1	27	12.23	375.225	96.8895	ab	94.123	1.73824	1.6981	1.7784	-0.5
SweetPotato-MED	Mean Duration of E1	15	30.705	140.207	60.3067	ab	30.0861	1.72682	1.6985	1.7551	-0.5
Cassava-IO	Mean Duration of E1	5	41.1233	247.95	104.784	ab	83.2711	1.77482	1.7129	1.8367	-0.5
SweetPotato-IO	Mean Duration of E1	9	38.65	144.936	71.0189	ab	42.4126	1.74144	1.7018	1.7811	-0.5
Cassava-SSA1_SG3	Mean duration of E2	38	165.37	40670.8	15601.9	a	13150	0.278761	0.2472	0.3103	-2.05
SweetPotato-SSA1_SG3	Mean duration of E2	15	771.226	33635	8704.54	a	8078.92	0.245836	0.2118	0.2798	-2.05
Tomato-SSA1_SG3	Mean duration of E2	15	265.468	7115.61	2147.71	bc	1702.98	0.150444	0.1234	0.1775	-2.05
Cotton-SSA1_SG3	Mean duration of E2	14	405.714	27901.1	7538.96	ab	8000.59	0.22029	0.1745	0.266	-2.05
Cassava-MED	Mean duration of E2	18	130.87	24762.9	2461.3	cd	5704.08	0.120514	0.08353	0.1575	-2.05
SweetPotato-MED	Mean duration of E2	15	1953.18	33546.8	7646.46	a	7981.25	0.235437	0.2038	0.2671	-2.05
Cassava-IO	Mean duration of E2	3	426.947	746.275	633.897	d	179.445	0.0938357	0.07573	0.1119	-2.05
SweetPotato-IO	Mean duration of E2	9	1551.57	38919.9	7842.64	ab	11754.1	0.225324	0.1765	0.2742	-2.05
Cassava-SSA1_SG3	Mean duration of NP	40	71.3357	2273.72	299.789	b	348.836	2.41799	2.3876	2.4484	-0.35
SweetPotato-SSA1_SG3	Mean duration of NP	15	121.409	325.393	205.712	b	66.0371	2.40512	2.3798	2.4305	-0.35
Tomato-SSA1_SG3	Mean duration of NP	15	106.573	10326.8	1213.57	a	2545.95	2.52294	2.4631	2.5828	-0.35
Cotton-SSA1_SG3	Mean duration of NP	14	43.12	1274.42	320.077	abc	356.948	2.39245	2.3155	2.4694	-0.35
Cassava-MED	Mean duration of NP	28	89.799	1023.3	309.778	ab	243.894	2.42592	2.3874	2.4644	-0.35
SweetPotato-MED	Mean duration of NP	15	80.7779	1112.61	318.773	abc	309.327	2.40618	2.3426	2.4698	-0.35
Cassava-IO	Mean duration of NP	5	80.02	337.072	216.413	abc	104.609	2.39742	2.3121	2.4827	-0.35
SweetPotato-IO	Mean duration of NP	9	55.6954	229.793	115.062	c	56.3231	2.28921	2.2267	2.3517	-0.35
Cassava-SSA1_SG3	Mean duration of probes	40	764.521	14313.3	4074	a	3495.13	3.44996	3.4177	3.4823	-0.25
SweetPotato-SSA1_SG3	Mean duration of probes	15	225.788	3178.25	1329.39	b	726.163	3.30182	3.24	3.3637	-0.25
Tomato-SSA1_SG3	Mean duration of probes	15	649.645	4073.22	1614.59	b	871.106	3.34841	3.3119	3.3849	-0.25
Cotton-SSA1_SG3	Mean duration of probes	14	477.219	10756.9	2390.77	ab	2624.78	3.36909	3.3089	3.4293	-0.25
Cassava-MED	Mean duration of probes	28	397.472	3706.02	1206.3	b	846.517	3.28134	3.2429	3.3198	-0.25
SweetPotato-MED	Mean duration of probes	15	417.828	2766.41	1402.05	b	613.744	3.3265	3.2851	3.3679	-0.25
Cassava-IO	Mean duration of probes	5	399.816	2461.16	982.777	b	839.225	3.23734	3.1304	3.3442	-0.25
SweetPotato-IO	Mean duration of probes	9	759.626	10645.8	2623.12	ab	3092.45	3.38102	3.3111	3.451	-0.25
Cassava-SSA1_SG3	Number of C	40	4	59	20.25	d	12.606	6.18736	5.4508	6.9239	0.45
SweetPotato-SSA1_SG3	Number of C	15	15	89	38.1333	ac	18.4966	9.09582	7.9463	10.2454	0.45
Tomato-SSA1_SG3	Number of C	15	7	53	31.4	c	10.8746	8.23317	7.3073	9.159	0.45
Cotton-SSA1_SG3	Number of C	14	7	67	27.9286	cd	14.7098	7.5934	6.409	8.7778	0.45
Cassava-MED	Number of C	28	18	74	47.5357	ab	18.3595	10.2818	9.4198	11.1438	0.45
SweetPotato-MED	Number of C	15	19	83	34.4667	bc	15.8198	8.65026	7.6582	9.6423	0.45
Cassava-IO	Number of C	5	39	66	51.8	a	9.98499	10.9735	9.9772	11.9697	0.45
SweetPotato-IO	Number of C	9	4	56	33.5556	acd	15.1502	8.38027	6.6423	10.1182	0.45
Cassava-SSA1_SG3	Number of pd	40	5	169	45.425	ac	38.136	4.72117	4.2741	5.1683	0.15
SweetPotato-SSA1_SG3	Number of pd	15	5	44	14.6667	d	10.4722	3.20026	2.7679	3.6326	0.15
Tomato-SSA1_SG3	Number of pd	15	4	74	34.0667	bcd	23.4383	4.34408	3.6875	5.0007	0.15
Cotton-SSA1_SG3	Number of pd	14	5	43	21.7143	cd	13.0645	3.71249	3.133	4.292	0.15
Cassava-MED	Number of pd	28	7	155	73.7143	a	42.8994	5.72565	5.2234	6.2279	0.15
SweetPotato-MED	Number of pd	15	3	71	34.2667	bc	19.4403	4.44084	3.8496	5.0321	0.15
Cassava-IO	Number of pd	5	26	136	78.2	ab	44.2063	5.93685	4.8712	7.0025	0.15
SweetPotato-IO	Number of pd	9	8	74	42.1111	ac	23.3047	4.79025	4.0069	5.5736	0.15
Cassava-SSA1_SG3	Number of short C events	40	0	28	7.125	b	6.54055	2.24658	1.8826	2.6106	0.2
SweetPotato-SSA1_SG3	Number of short C events	15	6	78	21.3333	a	19.1373	3.95181	3.3117	4.5919	0.2
Tomato-SSA1_SG3	Number of short C events	15	0	22	12	ab	5.98808	3.13901	2.5859	3.6921	0.2
Cotton-SSA1_SG3	Number of short C events	14	1	35	10.7143	ab	9.32679	2.74978	2.0038	3.4958	0.2
Cassava-MED	Number of short C events	28	1	32	14.75	a	9.95778	3.35514	2.8906	3.8197	0.2
SweetPotato-MED	Number of short C events	15	3	49	13.3333	ab	11.5861	3.18073	2.5629	3.7985	0.2
Cassava-IO	Number of short C events	5	3	29	17.6	ab	10.2372	3.7097	2.5617	4.8577	0.2
SweetPotato-IO	Number of short C events	9	1	31	11.8889	ab	8.92251	3.0276	2.2106	3.8446	0.2
Cassava-SSA1_SG3	Number of Probes<3min after first E1	40	0	25	3.175	b	5.06819	0.922316	0.6176	1.2271	0
SweetPotato-SSA1_SG3	Number of Probes<3min after first E1	15	0	62	12.3333	ab	18.2744	1.73956	1.0201	2.459	0
Tomato-SSA1_SG3	Number of Probes<3min after first E1	15	0	18	7	a	5.23723	1.84552	1.4517	2.2394	0
Cotton-SSA1_SG3	Number of Probes<3min after first E1	14	0	32	6.07143	ab	8.60648	1.39663	0.8062	1.987	0
Cassava-MED	Number of Probes<3min after first E1	28	0	25	9.82143	a	8.21946	1.9456	1.5349	2.3563	0
SweetPotato-MED	Number of Probes<3min after first E1	15	0	16	6.2	ab	5.28069	1.65624	1.2026	2.1099	0
Cassava-IO	Number of Probes<3min after first E1	5	2	16	8.8	a	5.71839	2.11197	1.4968	2.7272	0
SweetPotato-IO	Number of Probes<3min after first E1	9	0	21	7.77778	ab	6.47645	1.88378	1.292	2.4755	0
Cassava-SSA1_SG3	Number of Probes<3min after first G	40	0	23	2.875	bc	5.07476	0.639626	0.3902	0.8891	-0.2
SweetPotato-SSA1_SG3	Number of Probes<3min after first G	15	0	62	10.8	ab	15.5343	1.40254	0.9207	1.8844	-0.2
Tomato-SSA1_SG3	Number of Probes<3min after first G	15	0	18	5.26667	ac	5.52225	1.10497	0.6625	1.5474	-0.2
Cotton-SSA1_SG3	Number of Probes<3min after first G	14	0	32	4.07143	bc	8.65105	0.646965	0.1719	1.122	-0.2
Cassava-MED	Number of Probes<3min after first G	28	1	31	10.4643	a	9.23954	1.67986	1.4765	1.8833	-0.2
SweetPotato-MED	Number of Probes<3min after first G	15	0	16	2.86667	bc	5.40987	0.539384	0.1058	0.973	-0.2
Cassava-IO	Number of Probes<3min after first G	5	3	21	12.8	a	7.49667	1.91507	1.5111	2.319	-0.2
SweetPotato-IO	Number of Probes<3min after first G	9	0	15	1.66667	c	5	0.236473	-0.2313	0.7042	-0.2
Cassava-SSA1_SG3	Number of E1	40	1	14	3.8	c	2.98028	1.16011	1.0385	1.2817	-0.25
SweetPotato-SSA1_SG3	Number of E1	15	1	5	2.46667	c	1.35576	1.00514	0.8604	1.1499	-0.25
Tomato-SSA1_SG3	Number of E1	15	2	24	9.6	b	7.01834	1.62767	1.4164	1.839	-0.25
Cotton-SSA1_SG3	Number of E1	14	1	21	4.21429	bc	5.07147	1.16054	0.9413	1.3798	-0.25
Cassava-MED	Number of E1	28	0	18	4.46429	ac	4.08685	1.17511	0.9872	1.363	-0.25
SweetPotato-MED	Number of E1	15	1	17	5.2	bc	3.87667	1.3463	1.1612	1.5314	-0.25
Cassava-IO	Number of E1	5	1	6	3	bc	2.12132	1.06206	0.6993	1.4248	-0.25
SweetPotato-IO	Number of E1	9	1	17	9.33333	ab	5.2915	1.6485	1.3653	1.9317	-0.25
Cassava-SSA1_SG3	Number of E2	40	0	5	1.975	c	1.27073	0.975579	0.8498	1.1014	-0.05
SweetPotato-SSA1_SG3	Number of E2	15	1	5	2.46667	bc	1.35576	1.13747	0.9539	1.3211	-0.05
Tomato-SSA1_SG3	Number of E2	15	1	15	6.26667	a	4.14844	1.73296	1.449	2.0169	-0.05
Cotton-SSA1_SG3	Number of E2	14	1	16	3.5	ac	3.77746	1.27326	1.003	1.5435	-0.05
Cassava-MED	Number of E2	28	0	8	1.85714	c	2.04965	0.78158	0.5267	1.0365	-0.05
SweetPotato-MED	Number of E2	15	1	11	4	ab	2.67261	1.43123	1.1971	1.6654	-0.05
Cassava-IO	Number of E2	5	0	3	1.2	bc	1.30384	0.617919	0.07776	1.1581	-0.05
SweetPotato-IO	Number of E2	9	1	12	6.55556	a	3.32081	1.81901	1.49	2.148	-0.05
Cassava-SSA1_SG3	Number of F waveforms	40	0	7	1.7	c	1.78599	0.851195	0.636	1.0664	0.1
SweetPotato-SSA1_SG3	Number of F waveforms	15	0	14	6.26667	a	4.14844	1.97104	1.5269	2.4152	0.1
Tomato-SSA1_SG3	Number of F waveforms	15	0	9	2.26667	bc	2.25093	1.08018	0.7382	1.4222	0.1
Cotton-SSA1_SG3	Number of F waveforms	14	1	11	5.14286	a	2.82454	1.87507	1.5626	2.1875	0.1
Cassava-MED	Number of F waveforms	28	0	14	4.42857	ab	3.61508	1.56254	1.214	1.9111	0.1
SweetPotato-MED	Number of F waveforms	15	0	8	3.26667	ac	2.63131	1.34173	0.9277	1.7558	0.1
Cassava-IO	Number of F waveforms	5	0	14	4.4	ac	5.50454	1.44908	0.4656	2.4326	0.1
SweetPotato-IO	Number of F waveforms	9	0	10	3.88889	ac	3.72305	1.37849	0.6889	2.0681	0.1
Cassava-SSA1_SG3	Number of G	40	0	12	1.5	cd	2.2532	0.573791	0.3908	0.7568	-0.2
SweetPotato-SSA1_SG3	Number of G	15	0	6	1.8	bc	1.69874	0.753092	0.4779	1.0283	-0.2
Tomato-SSA1_SG3	Number of G	15	0	2	1.33333	c	0.816497	0.698622	0.4991	0.8981	-0.2
Cotton-SSA1_SG3	Number of G	14	0	4	1.21429	cd	1.42389	0.54663	0.2616	0.8317	-0.2
Cassava-MED	Number of G	28	1	10	4	a	2.3094	1.27878	1.1415	1.4161	-0.2
SweetPotato-MED	Number of G	15	0	2	0.533333	cd	0.743223	0.304105	0.1001	0.5081	-0.2
Cassava-IO	Number of G	5	2	5	3.6	ab	1.51658	1.27208	1.0366	1.5076	-0.2
SweetPotato-IO	Number of G	9	0	3	0.333333	d	1	0.134523	-0.1316	0.4006	-0.2
Cassava-SSA1_SG3	Number of sustained E2	40	0	4	1.5	cd	0.9337	0.88979	0.7568	1.0228	0.1
SweetPotato-SSA1_SG3	Number of sustained E2	15	1	5	2.13333	bc	1.18723	1.14924	0.9478	1.3506	0.1
Tomato-SSA1_SG3	Number of sustained E2	15	0	8	3.46667	ab	2.13363	1.49399	1.1876	1.8004	0.1
Cotton-SSA1_SG3	Number of sustained E2	14	1	3	1.85714	bc	0.864438	1.06423	0.8863	1.2422	0.1
Cassava-MED	Number of sustained E2	28	0	4	0.821429	e	1.05597	0.486428	0.2811	0.6918	0.1
SweetPotato-MED	Number of sustained E2	15	1	6	3.06667	ab	1.70992	1.41795	1.1652	1.6707	0.1
Cassava-IO	Number of sustained E2	5	0	1	0.6	de	0.547723	0.430641	0.0829	0.7784	0.1
SweetPotato-IO	Number of sustained E2	9	1	7	4.77778	a	1.7873	1.8513	1.5338	2.1688	0.1
Cassava-SSA1_SG3	Number of sustained G	40	0	9	1.2	ac	1.69766	0.472997	0.3205	0.6255	-0.35
SweetPotato-SSA1_SG3	Number of sustained G	15	0	3	1.46667	ab	1.18723	0.639435	0.415	0.8638	-0.35
Tomato-SSA1_SG3	Number of sustained G	15	0	2	1.26667	a	0.798809	0.630783	0.4503	0.8113	-0.35
Cotton-SSA1_SG3	Number of sustained G	14	0	4	1.07143	ac	1.38477	0.460744	0.2162	0.7053	-0.35
Cassava-MED	Number of sustained G	28	0	6	1.78571	a	1.57191	0.714827	0.5572	0.8725	-0.35
SweetPotato-MED	Number of sustained G	15	0	2	0.4	bc	0.632456	0.22493	0.05292	0.3969	-0.35
Cassava-IO	Number of sustained G	5	1	4	2.2	a	1.30384	0.894373	0.6479	1.1408	-0.35
SweetPotato-IO	Number of sustained G	9	0	3	0.333333	c	1	0.122041	-0.1194	0.3634	-0.35
Cassava-SSA1_SG3	Number of NP	40	3	49	16.325	c	10.4695	4.57523	4.0591	5.0914	0.35
SweetPotato-SSA1_SG3	Number of NP	15	13	89	35.1333	ab	19.0446	6.926	6.0836	7.7684	0.35
Tomato-SSA1_SG3	Number of NP	15	3	36	22.3333	ac	8.38934	5.57898	4.8957	6.2622	0.35
Cotton-SSA1_SG3	Number of NP	14	4	66	24.5	bc	15.1391	5.70696	4.7638	6.6501	0.35
Cassava-MED	Number of NP	28	11	66	38.6786	b	17.8264	7.23734	6.5744	7.9003	0.35
SweetPotato-MED	Number of NP	15	14	78	30	ab	15.418	6.45559	5.7344	7.1768	0.35
Cassava-IO	Number of NP	5	17	62	44.4	ab	16.9056	7.82276	6.3476	9.298	0.35
SweetPotato-IO	Number of NP	9	4	51	26	bc	13.3791	5.91027	4.7118	7.1087	0.35
Cassava-SSA1_SG3	Number of probes	40	3	49	16.275	c	10.4709	4.56492	4.0469	5.0829	0.35
SweetPotato-SSA1_SG3	Number of probes	15	13	88	34.8	ab	18.8801	6.89495	6.0567	7.7331	0.35
Tomato-SSA1_SG3	Number of probes	15	3	36	22.0667	ac	8.42163	5.5424	4.8574	6.2274	0.35
Cotton-SSA1_SG3	Number of probes	14	4	66	24.5	bc	15.1391	5.70696	4.7638	6.6501	0.35
Cassava-MED	Number of probes	28	10	66	38.2857	b	17.8779	7.19286	6.5202	7.8655	0.35
SweetPotato-MED	Number of probes	15	13	78	29.8	ab	15.5343	6.42792	5.6955	7.1603	0.35
Cassava-IO	Number of probes	5	17	61	44	ab	16.6132	7.79289	6.3352	9.2506	0.35
SweetPotato-IO	Number of probes	9	4	51	26	bc	13.3791	5.91027	4.7118	7.1087	0.35
Cassava-SSA1_SG3	Number of Probes after first E1	40	0	42	7.225	b	8.99426	2.23425	1.6316	2.8369	0.3
SweetPotato-SSA1_SG3	Number of Probes after first E1	15	0	69	17.4	ab	20.3217	3.60054	2.1794	5.0216	0.3
Tomato-SSA1_SG3	Number of Probes after first E1	15	1	31	13	ab	8.33238	3.72259	2.9797	4.4654	0.3
Cotton-SSA1_SG3	Number of Probes after first E1	14	0	57	12.7143	ab	15.7989	3.08163	1.7936	4.3697	0.3
Cassava-MED	Number of Probes after first E1	28	0	56	24	a	16.8149	4.75951	3.8611	5.6579	0.3
SweetPotato-MED	Number of Probes after first E1	15	0	32	15.7333	a	9.26951	4.04768	3.155	4.9403	0.3
Cassava-IO	Number of Probes after first E1	5	12	37	24.2	a	11.3225	5.2814	4.1873	6.3755	0.3
SweetPotato-IO	Number of Probes after first E1	9	0	36	16.5556	ab	10.8179	4.13311	2.9034	5.3629	0.3
Cassava-SSA1_SG3	Number of Probes after first G	40	0	38	7.175	bc	10.2078	1.45599	0.9665	1.9455	0.1
SweetPotato-SSA1_SG3	Number of Probes after first G	15	0	69	18.4667	ab	18.4037	2.68663	1.7636	3.6097	0.1
Tomato-SSA1_SG3	Number of Probes after first G	15	0	31	9.4	bc	9.15579	2.07266	1.3461	2.7992	0.1
Cotton-SSA1_SG3	Number of Probes after first G	14	0	57	9.5	bc	15.5105	1.65449	0.7467	2.5623	0.1
Cassava-MED	Number of Probes after first G	28	7	60	27.3571	a	16.9076	3.73881	3.4095	4.0681	0.1
SweetPotato-MED	Number of Probes after first G	15	0	36	6.26667	bc	11.2025	1.14998	0.3224	1.9776	0.1
Cassava-IO	Number of Probes after first G	5	16	45	34.2	a	11.7346	4.20489	3.7052	4.7046	0.1
SweetPotato-IO	Number of Probes after first G	9	0	30	3.33333	c	10	0.455256	-0.4452	1.3557	0.1
Cassava-SSA1_SG3	Number of single E1	40	0	12	1.75	ab	2.45733	0.540099	0.4056	0.6746	-0.55
SweetPotato-SSA1_SG3	Number of single E1	15	0	0	0	c	0	-3.44169e-15			-0.55
Tomato-SSA1_SG3	Number of single E1	15	0	13	3.2	a	3.46822	0.757794	0.5217	0.9939	-0.55
Cotton-SSA1_SG3	Number of single E1	14	0	3	0.571429	bc	1.01635	0.228219	0.02594	0.4305	-0.55
Cassava-MED	Number of single E1	28	0	11	2.42857	a	2.67261	0.677691	0.517	0.8384	-0.55
SweetPotato-MED	Number of single E1	15	0	6	1.13333	ab	1.84649	0.386098	0.1711	0.6011	-0.55
Cassava-IO	Number of single E1	5	1	3	1.6	a	0.894427	0.704702	0.5427	0.8667	-0.55
SweetPotato-IO	Number of single E1	9	0	12	2.66667	ab	3.80789	0.655704	0.3527	0.9587	-0.55
Cassava-SSA1_SG3	Potential E2 Index (E2/(time from start of first E2 to end of recording))	38	1.8062	100	73.6983	c	31.1354	0.427551	0.292	0.5631	0.9	Yes
SweetPotato-SSA1_SG3	Potential E2 Index (E2/(time from start of first E2 to end of recording))	15	16.472	100	66.5634	c	27.973	0.540096	0.3529	0.7273	0.9	Yes
Tomato-SSA1_SG3	Potential E2 Index (E2/(time from start of first E2 to end of recording))	15	5.25245	74.1419	38.6927	b	17.8778	0.885229	0.786	0.9844	0.9	Yes
Cotton-SSA1_SG3	Potential E2 Index (E2/(time from start of first E2 to end of recording))	14	6.21414	100	58.9079	bc	34.6754	0.621338	0.3866	0.8561	0.9	Yes
Cassava-MED	Potential E2 Index (E2/(time from start of first E2 to end of recording))	18	0.986871	73.6665	16.2072	a	20.5516	1.17265	1.0542	1.2911	0.9	Yes
SweetPotato-MED	Potential E2 Index (E2/(time from start of first E2 to end of recording))	15	12.6574	100	60.9189	bc	24.823	0.631781	0.4798	0.7838	0.9	Yes
Cassava-IO	Potential E2 Index (E2/(time from start of first E2 to end of recording))	3	1.96662	7.81272	4.3451	a	3.07146	1.33044	1.2415	1.4194	0.9	Yes
SweetPotato-IO	Potential E2 Index (E2/(time from start of first E2 to end of recording))	9	41.5367	100	70.4109	c	18.4988	0.528114	0.3631	0.6931	0.9	Yes
Cassava-SSA1_SG3	Percent E2 spent in Sustained E2	38	0	100	82.6754	c	28.1313	1.31643	0.7165	1.9164	0
SweetPotato-SSA1_SG3	Percent E2 spent in Sustained E2	15	50	100	89.2222	bc	16.9133	1.15378	0.2855	2.0221	0
Tomato-SSA1_SG3	Percent E2 spent in Sustained E2	15	0	100	62.101	ab	31.1923	2.98201	2.1498	3.8142	0
Cotton-SSA1_SG3	Percent E2 spent in Sustained E2	14	6.25	100	75.4464	ac	28.9619	2.09044	1.0765	3.1044	0
Cassava-MED	Percent E2 spent in Sustained E2	18	0	100	46.9907	a	35.9797	3.24743	2.4001	4.0948	0
SweetPotato-MED	Percent E2 spent in Sustained E2	15	50	100	81.9062	ac	20.9799	1.83568	0.9076	2.7638	0
Cassava-IO	Percent E2 spent in Sustained E2	3	33.3333	100	61.1111	ac	34.6944	2.71547	0.02216	5.4088	0
SweetPotato-IO	Percent E2 spent in Sustained E2	9	54.5455	100	79.2617	ac	18.8073	2.25454	1.1109	3.3982	0
Cassava-SSA1_SG3	Percent probing spent in C	40	2.95296	88.8526	32.2427	b	22.8195	0.403168	0.3513	0.4551	-0.3	Yes
SweetPotato-SSA1_SG3	Percent probing spent in C	15	8.40643	59.1913	23.9641	b	14.074	0.362799	0.3089	0.4167	-0.3	Yes
Tomato-SSA1_SG3	Percent probing spent in C	15	18.9794	67.8676	34.7696	b	13.1947	0.447398	0.4074	0.4873	-0.3	Yes
Cotton-SSA1_SG3	Percent probing spent in C	14	10.9507	53.3258	30.7972	b	13.0404	0.417019	0.3671	0.4669	-0.3	Yes
Cassava-MED	Percent probing spent in C	28	30.7132	94.5622	69.526	a	18.225	0.63782	0.601	0.6746	-0.3	Yes
SweetPotato-MED	Percent probing spent in C	15	12.0236	71.507	34.9759	b	15.9481	0.443636	0.3922	0.4951	-0.3	Yes
Cassava-IO	Percent probing spent in C	5	52.9676	89.4063	75.9968	a	14.778	0.671502	0.6027	0.7403	-0.3	Yes
SweetPotato-IO	Percent probing spent in C	9	8.51224	40.0647	26.0428	b	10.9097	0.384839	0.3261	0.4436	-0.3	Yes
Cassava-SSA1_SG3	Percent probing spent in E1	40	0.0451938	3.34866	0.559951	b	0.674449	0.104912	0.0931	0.1167	-4.15	Yes
SweetPotato-SSA1_SG3	Percent probing spent in E1	15	0.0855815	2.98099	0.749168	b	0.844324	0.115259	0.0946	0.1359	-4.15	Yes
Tomato-SSA1_SG3	Percent probing spent in E1	15	0.300311	11.389	3.30479	a	3.24026	0.170988	0.1506	0.1913	-4.15	Yes
Cotton-SSA1_SG3	Percent probing spent in E1	14	0.065762	16.1744	1.78969	ab	4.21722	0.119866	0.09228	0.1475	-4.15	Yes
Cassava-MED	Percent probing spent in E1	28	0	5.13112	1.15975	b	1.33002	0.125869	0.1071	0.1447	-4.15	Yes
SweetPotato-MED	Percent probing spent in E1	15	0.101052	2.49592	0.916998	ab	0.676375	0.130655	0.1128	0.1485	-4.15	Yes
Cassava-IO	Percent probing spent in E1	5	0.354709	1.01666	0.680167	b	0.304377	0.127349	0.1112	0.1435	-4.15	Yes
SweetPotato-IO	Percent probing spent in E1	9	0.0907631	5.95887	1.99135	ab	1.95829	0.151614	0.1211	0.1821	-4.15	Yes
Cassava-SSA1_SG3	Percent probing spent in E2	40	0	94.7155	52.7374	bd	31.4047	0.664943	0.5505	0.7794	0.75	Yes
SweetPotato-SSA1_SG3	Percent probing spent in E2	15	9.70951	85.952	43.0799	bd	21.5957	0.761981	0.6506	0.8734	0.75	Yes
Tomato-SSA1_SG3	Percent probing spent in E2	15	2.05986	70.4009	34.1268	b	18.4792	0.85837	0.7607	0.956	0.75	Yes
Cotton-SSA1_SG3	Percent probing spent in E2	14	5.82186	80.9774	39.8677	bc	24.1323	0.801511	0.6713	0.9317	0.75	Yes
Cassava-MED	Percent probing spent in E2	28	0	64.5861	8.71062	a	15.8548	1.19882	1.1196	1.278	0.75	Yes
SweetPotato-MED	Percent probing spent in E2	15	14.7663	81.7257	55.9896	cd	18.1547	0.639222	0.5461	0.7323	0.75	Yes
Cassava-IO	Percent probing spent in E2	5	0	4.3313	1.89786	a	1.90516	1.28669	1.2145	1.3589	0.75	Yes
SweetPotato-IO	Percent probing spent in E2	9	43.8563	91.397	66.4141	d	15.6039	0.52525	0.4064	0.6441	0.75	Yes
Cassava-SSA1_SG3	Percent probing spent in F	40	0	33.0127	5.8782	c	8.21998	1.53886	1.0836	1.9941	0.15
SweetPotato-SSA1_SG3	Percent probing spent in F	15	0	37.2466	18.7565	ab	12.0048	3.38254	2.6786	4.0865	0.15
Tomato-SSA1_SG3	Percent probing spent in F	15	0	34.3499	9.34404	ac	9.4089	2.3231	1.635	3.0112	0.15
Cotton-SSA1_SG3	Percent probing spent in F	14	2.00357	38.3405	17.0865	a	8.94269	3.44118	2.9627	3.9197	0.15
Cassava-MED	Percent probing spent in F	28	0	38.6488	9.08251	bc	10.3513	2.1728	1.6335	2.7121	0.15
SweetPotato-MED	Percent probing spent in F	15	0	15.8796	5.98321	c	5.23205	1.92472	1.3656	2.4838	0.15
Cassava-IO	Percent probing spent in F	5	0	35.1766	10.488	ac	14.3634	2.16595	0.5534	3.7785	0.15
SweetPotato-IO	Percent probing spent in F	9	0	9.94439	4.30753	c	4.32171	1.44822	0.5986	2.2978	0.15
Cassava-SSA1_SG3	Percent probing spent in G	40	0	56.7617	8.58176	bc	14.6942	1.23769	0.8381	1.6373	-0.05
SweetPotato-SSA1_SG3	Percent probing spent in G	15	0	32.4615	13.4502	ab	11.778	1.89286	1.2258	2.5599	-0.05
Tomato-SSA1_SG3	Percent probing spent in G	15	0	70.032	18.4547	ab	19.5191	2.16184	1.5192	2.8045	-0.05
Cotton-SSA1_SG3	Percent probing spent in G	14	0	69.5766	10.4588	ac	18.8561	1.32884	0.6116	2.0461	-0.05
Cassava-MED	Percent probing spent in G	28	1.39122	51.6543	11.5211	a	12.2285	2.0219	1.7313	2.3125	-0.05
SweetPotato-MED	Percent probing spent in G	15	0	19.2143	2.13432	c	4.91299	0.584474	0.15	1.019	-0.05
Cassava-IO	Percent probing spent in G	5	5.44097	27.8117	10.9372	ab	9.50133	2.16464	1.6905	2.6388	-0.05
SweetPotato-IO	Percent probing spent in G	9	0	11.1977	1.24419	c	3.73256	0.26124	-0.2555	0.778	-0.05
Cassava-SSA1_SG3	Duration of shortest C before first E1 in any probe	40	59.42	4847.41	1505.16	ab	1109.11	12.586	11.8269	13.345	0.15
SweetPotato-SSA1_SG3	Duration of shortest C before first E1 in any probe	15	705.64	2938.79	1301.14	a	560.83	12.7073	12.1481	13.2665	0.15
Tomato-SSA1_SG3	Duration of shortest C before first E1 in any probe	15	496.49	1750.99	848.698	b	311.794	11.5438	11.0791	12.0085	0.15
Cotton-SSA1_SG3	Duration of shortest C before first E1 in any probe	14	630.64	2287.29	1126.84	ab	501.151	12.2775	11.6807	12.8743	0.15
Cassava-MED	Duration of shortest C before first E1 in any probe	27	142.51	6151.33	1344.14	ab	1313.7	12.1146	11.1973	13.0319	0.15
SweetPotato-MED	Duration of shortest C before first E1 in any probe	15	451.87	1653.19	831.239	b	359.543	11.4381	10.894	11.9821	0.15
Cassava-IO	Duration of shortest C before first E1 in any probe	5	750.84	1382.77	991.634	ab	273.426	12.0318	11.3642	12.6994	0.15
SweetPotato-IO	Duration of shortest C before first E1 in any probe	9	509.4	2966.52	960.938	ab	764.049	11.6237	10.619	12.6285	0.15
Cassava-SSA1_SG3	Time from start of probe with first E to 1st E	40	59.42	9244.82	1985.05	a	1706.66	10.742	10.1634	11.3207	0.1
SweetPotato-SSA1_SG3	Time from start of probe with first E to 1st E	15	857.19	4061.44	1703.69	a	893.649	10.8397	10.3355	11.3438	0.1
Tomato-SSA1_SG3	Time from start of probe with first E to 1st E	15	496.49	1752.13	1022.28	a	384.163	9.88189	9.5001	10.2637	0.1
Cotton-SSA1_SG3	Time from start of probe with first E to 1st E	14	716.96	6777.32	1937.86	a	1592.72	10.9127	10.2052	11.6202	0.1
Cassava-MED	Time from start of probe with first E to 1st E	27	581.8	6151.33	1627.12	a	1199.16	10.6022	10.1364	11.068	0.1
SweetPotato-MED	Time from start of probe with first E to 1st E	15	516.49	3841.28	1505.01	a	1079.76	10.4122	9.7424	11.0819	0.1
Cassava-IO	Time from start of probe with first E to 1st E	5	750.84	1382.77	1037.51	a	241.67	9.98942	9.5791	10.3997	0.1
SweetPotato-IO	Time from start of probe with first E to 1st E	9	658.81	2966.52	1193.86	a	740.157	10.0823	9.4167	10.7479	0.1
Cassava-SSA1_SG3	Time from start of probe with first G to 1st G	22	90.42	5834.37	1779.25	a	1686.24	15.6978	13.78	17.6156	0.2
SweetPotato-SSA1_SG3	Time from start of probe with first G to 1st G	11	110.52	3212.22	1778.9	a	992.495	16.4308	14.1843	18.6774	0.2
Tomato-SSA1_SG3	Time from start of probe with first G to 1st G	12	144.94	10311.8	2805.09	a	3058.22	17.4939	14.5483	20.4396	0.2
Cotton-SSA1_SG3	Time from start of probe with first G to 1st G	8	279.13	4105.82	1992.75	a	1383.46	16.8617	14.2228	19.5006	0.2
Cassava-MED	Time from start of probe with first G to 1st G	28	240.56	6262.02	1799.27	a	1632.61	15.9459	14.4102	17.4816	0.2
SweetPotato-MED	Time from start of probe with first G to 1st G	6	584.95	3253.83	1565.57	a	971.43	16.2429	14.1209	18.3649	0.2
Cassava-IO	Time from start of probe with first G to 1st G	5	570.24	3171.15	1593.51	a	1014.83	16.2715	13.7536	18.7894	0.2
SweetPotato-IO	Time from start of probe with first G to 1st G	1	1026.58	1026.58	1026.58	a		15.014	15.014	15.014	0.2
Cassava-SSA1_SG3	Time from end of last pd in probe to end of first probe	40	5.99	40839.4	4341.88	a	10320.4	4.47686	4.1235	4.8303	-0.1
SweetPotato-SSA1_SG3	Time from end of last pd in probe to end of first probe	15	17.07	33969.1	7419.21	a	9912.17	4.95454	4.3008	5.6083	-0.1
Tomato-SSA1_SG3	Time from end of last pd in probe to end of first probe	15	18.03	11449.5	2063.46	a	3184.17	4.65267	4.1391	5.1662	-0.1
Cotton-SSA1_SG3	Time from end of last pd in probe to end of first probe	14	107.62	28122.1	4154.67	a	7383.82	5.04922	4.6118	5.4866	-0.1
Cassava-MED	Time from end of last pd in probe to end of first probe	28	24.74	16361.4	1461.62	a	3505.88	4.48917	4.2027	4.7756	-0.1
SweetPotato-MED	Time from end of last pd in probe to end of first probe	15	97.31	33689.3	3265.18	a	8538.6	4.74082	4.329	5.1527	-0.1
Cassava-IO	Time from end of last pd in probe to end of first probe	5	46	1006	463.904	a	403.982	4.29529	3.6557	4.9349	-0.1
SweetPotato-IO	Time from end of last pd in probe to end of first probe	9	29.1	39091.8	5758.6	a	12829	4.52073	3.6898	5.3517	-0.1
Cassava-SSA1_SG3	Time from end of last pd to beginning of E1 followed by sustained E2	36	60.08	2670.55	299.692	a	434.742	2.19998	2.1772	2.2227	-0.4
SweetPotato-SSA1_SG3	Time from end of last pd to beginning of E1 followed by sustained E2	15	85.42	1488.75	386.651	a	438.971	2.22309	2.1856	2.2606	-0.4
Tomato-SSA1_SG3	Time from end of last pd to beginning of E1 followed by sustained E2	14	90.51	2372.98	385.886	a	628.114	2.1944	2.1509	2.2379	-0.4
Cotton-SSA1_SG3	Time from end of last pd to beginning of E1 followed by sustained E2	14	114.61	762.72	259.689	a	185.071	2.20391	2.1713	2.2365	-0.4
Cassava-MED	Time from end of last pd to beginning of E1 followed by sustained E2	14	81.52	290.36	160.356	a	58.279	2.16234	2.138	2.1866	-0.4
SweetPotato-MED	Time from end of last pd to beginning of E1 followed by sustained E2	15	29.43	1972.9	271.353	a	476.858	2.14798	2.0885	2.2074	-0.4
Cassava-IO	Time from end of last pd to beginning of E1 followed by sustained E2	3	157.09	251.8	209.033	a	48.0172	2.20241	2.1691	2.2357	-0.4
SweetPotato-IO	Time from end of last pd to beginning of E1 followed by sustained E2	9	75.59	779.83	263.796	a	253.681	2.17842	2.1153	2.2415	-0.4
Cassava-SSA1_SG3	Time from first probe to 1st E	40	1916.77	36782.1	11301	a	9909.63	19.1451	18.0732	20.2169	0.15
SweetPotato-SSA1_SG3	Time from first probe to 1st E	15	896.91	35754.1	17533.9	a	10655.4	21.1411	19.1778	23.1044	0.15
Tomato-SSA1_SG3	Time from first probe to 1st E	15	1414.98	30784.7	10496.6	ab	9293.74	18.7713	16.9014	20.6412	0.15
Cotton-SSA1_SG3	Time from first probe to 1st E	14	2210.64	39812.3	13977.8	a	9843.03	20.4279	18.8439	22.0119	0.15
Cassava-MED	Time from first probe to 1st E	27	1591	35964.7	15159.7	a	10299.4	20.5935	19.3211	21.8659	0.15
SweetPotato-MED	Time from first probe to 1st E	15	1291.47	26470.6	9341.74	ab	6519.85	18.7015	17.0832	20.3199	0.15
Cassava-IO	Time from first probe to 1st E	5	3661.71	27119	13994.9	ab	10824.4	20.2737	17.1731	23.3743	0.15
SweetPotato-IO	Time from first probe to 1st E	9	2002.45	6415.7	4476.97	b	1635.73	16.6552	15.717	17.5933	0.15
Cassava-SSA1_SG3	Time from first probe to 1st G	22	157.68	33139.1	8465.26	a	8484.03	42.3712	36.2151	48.5273	0.3
SweetPotato-SSA1_SG3	Time from first probe to 1st G	11	2549.39	37204.5	9583.56	a	9513.7	46.1171	39.4775	52.7568	0.3
Tomato-SSA1_SG3	Time from first probe to 1st G	12	1364.38	27702.1	10338.7	a	8878.56	46.2682	37.9822	54.5542	0.3
Cotton-SSA1_SG3	Time from first probe to 1st G	8	1118.11	34421.5	12786	a	9689.73	50.5153	40.9291	60.1015	0.3
Cassava-MED	Time from first probe to 1st G	28	253.59	25710.2	9603.31	a	7627.56	45.125	39.9461	50.3039	0.3
SweetPotato-MED	Time from first probe to 1st G	6	3419.16	28813.4	11616.3	a	9533.59	48.9833	38.4162	59.5505	0.3
Cassava-IO	Time from first probe to 1st G	5	570.24	14706.1	7764.85	ab	5424.5	42.2578	29.4436	55.0721	0.3
SweetPotato-IO	Time from first probe to 1st G	1	2370.22	2370.22	2370.22	b		30.9727	30.9727	30.9727	0.3
Cassava-SSA1_SG3	Time to first pd from beginning of first probe	40	251.56	29364	4552.19	c	6403.79	9.57077	9.0642	10.0774	0.05
SweetPotato-SSA1_SG3	Time to first pd from beginning of first probe	15	699.12	31904.5	14495.6	ab	9649.3	11.7126	10.8328	12.5924	0.05
Tomato-SSA1_SG3	Time to first pd from beginning of first probe	15	901.62	30237.9	7026.72	bc	7901.81	10.3776	9.5438	11.2113	0.05
Cotton-SSA1_SG3	Time to first pd from beginning of first probe	14	1630.36	27850.9	10992.8	b	6960.7	11.5262	10.9166	12.1359	0.05
Cassava-MED	Time to first pd from beginning of first probe	28	184.17	31661.2	6320.77	ac	7163.99	10.0983	9.4183	10.7783	0.05
SweetPotato-MED	Time to first pd from beginning of first probe	15	199.43	21124.5	6634.59	bc	5310.68	10.4828	9.6354	11.3303	0.05
Cassava-IO	Time to first pd from beginning of first probe	5	1611.74	15962	4884.46	bc	6225.1	9.90837	8.6026	11.2141	0.05
SweetPotato-IO	Time to first pd from beginning of first probe	9	1773.16	5732.52	3131.72	c	1319.71	9.81052	9.4275	10.1935	0.05
Cassava-SSA1_SG3	Time to first E2 from start of first probe	38	1938.12	35099	14188.2	a	9995.44	52.0147	47.7792	56.2502	0.3
SweetPotato-SSA1_SG3	Time to first E2 from start of first probe	15	924.12	35803.2	17634.3	a	10652.8	55.8398	48.2526	63.427	0.3
Tomato-SSA1_SG3	Time to first E2 from start of first probe	15	1454.07	30819.6	11521.3	ab	8684.9	48.7598	42.4546	55.0651	0.3
Cotton-SSA1_SG3	Time to first E2 from start of first probe	14	2245.45	39846.2	15546.8	a	9992.91	54.2674	47.6793	60.8556	0.3
Cassava-MED	Time to first E2 from start of first probe	18	1616.08	29975	13675.7	a	8922.99	51.8216	45.9846	57.6585	0.3
SweetPotato-MED	Time to first E2 from start of first probe	15	1360.52	26522.9	9467.57	ab	6574.47	45.8596	39.879	51.8402	0.3
Cassava-IO	Time to first E2 from start of first probe	3	3691.61	24014.5	11277.4	ab	11097.6	47.8339	30.0803	65.5875	0.3
SweetPotato-IO	Time to first E2 from start of first probe	9	2050	7044.02	4819.71	b	1818.84	38.4506	34.9689	41.9322	0.3
Cassava-SSA1_SG3	Time to first E2 from start of that probe	38	438.42	4861.1	2258.72	a	1175.12	2.98578	2.9664	3.0051	-0.3
SweetPotato-SSA1_SG3	Time to first E2 from start of that probe	15	924.12	4150.78	1804.16	ab	889.553	2.96881	2.9452	2.9924	-0.3
Tomato-SSA1_SG3	Time to first E2 from start of that probe	15	577.74	2862.89	1238.24	b	581.545	2.92689	2.9019	2.9519	-0.3
Cotton-SSA1_SG3	Time to first E2 from start of that probe	14	751.47	7372.87	1966.49	ab	1702.3	2.96438	2.9332	2.9956	-0.3
Cassava-MED	Time to first E2 from start of that probe	18	464.65	6887.19	1456.62	b	1462.61	2.92233	2.8883	2.9564	-0.3
SweetPotato-MED	Time to first E2 from start of that probe	15	558.91	4528.61	1630.84	ab	1208	2.94145	2.9051	2.9778	-0.3
Cassava-IO	Time to first E2 from start of that probe	3	781.61	1552.28	1116.82	ab	394.996	2.92106	2.8728	2.9693	-0.3
SweetPotato-IO	Time to first E2 from start of that probe	9	706.36	3005.17	1280.16	ab	742.743	2.92646	2.8901	2.9628	-0.3
Cassava-SSA1_SG3	Time to first E2 from start of EPG	38	2110.28	36842.5	14627.9	a	10080.3	52.7384	48.6125	56.8643	0.3
SweetPotato-SSA1_SG3	Time to first E2 from start of EPG	15	1125.29	35862.1	18170.5	a	10860.4	56.5717	49.1722	63.9712	0.3
Tomato-SSA1_SG3	Time to first E2 from start of EPG	15	3657.01	35386.9	17469.4	a	10045.6	56.6856	50.5429	62.8283	0.3
Cotton-SSA1_SG3	Time to first E2 from start of EPG	14	2283.56	40126.7	15740.1	a	10091.3	54.4976	47.9062	61.0889	0.3
Cassava-MED	Time to first E2 from start of EPG	18	1807.44	39185.6	14655.8	a	9946.05	52.9772	47.0558	58.8986	0.3
SweetPotato-MED	Time to first E2 from start of EPG	15	1544.45	26547.5	9546.51	ab	6546.52	46.1082	40.2688	51.9475	0.3
Cassava-IO	Time to first E2 from start of EPG	3	3861.65	24095.9	11372	ab	11078.9	48.0587	30.5083	65.6091	0.3
SweetPotato-IO	Time to first E2 from start of EPG	9	2110.37	7137.02	4898.41	b	1835.55	38.6638	35.1914	42.1362	0.3
Cassava-SSA1_SG3	Time from beginning of EPG to first probe	40	0.5	2769.81	489.481	b	741.46	5.21475	4.7396	5.6899	0
SweetPotato-SSA1_SG3	Time from beginning of EPG to first probe	15	0.05	3091.6	536.172	abc	814.503	4.64389	3.292	5.9957	0
Tomato-SSA1_SG3	Time from beginning of EPG to first probe	15	51.9	30816.2	5948.11	a	8244.87	7.1653	6.0164	8.3142	0
Cotton-SSA1_SG3	Time from beginning of EPG to first probe	14	38.11	684.61	193.296	bc	180.154	4.90963	4.4422	5.3771	0
Cassava-MED	Time from beginning of EPG to first probe	28	34.95	9210.58	912.281	ab	2003.18	5.6416	5.1191	6.1641	0
SweetPotato-MED	Time from beginning of EPG to first probe	15	15.37	230.27	78.9393	c	65.6392	4.06648	3.6412	4.4917	0
Cassava-IO	Time from beginning of EPG to first probe	5	32.25	923	378.136	abc	400.446	5.28311	4.041	6.5252	0
SweetPotato-IO	Time from beginning of EPG to first probe	9	43.41	189.36	78.6978	c	49.3337	4.24597	3.9082	4.5837	0
Cassava-SSA1_SG3	Time to first sustained E2 from start of recording	36	2110.28	36842.5	14742.2	a	9510.05	53.1329	49.0282	57.2375	0.3
SweetPotato-SSA1_SG3	Time to first sustained E2 from start of recording	15	1125.29	35862.1	18238.7	a	10888.7	56.6331	49.2118	64.0545	0.3
Tomato-SSA1_SG3	Time to first sustained E2 from start of recording	14	3657.01	32270.2	16433.1	a	9282.5	55.6698	49.5049	61.8346	0.3
Cotton-SSA1_SG3	Time to first sustained E2 from start of recording	14	4601.55	40126.7	20225.9	a	11151.2	59.612	53.2411	65.9829	0.3
Cassava-MED	Time to first sustained E2 from start of recording	14	3834.13	40252.8	18028.1	a	11657.3	57.0054	50.3644	63.6465	0.3
SweetPotato-MED	Time to first sustained E2 from start of recording	15	1590.79	26547.5	10373.5	ab	6915.29	47.572	41.8578	53.2862	0.3
Cassava-IO	Time to first sustained E2 from start of recording	3	6158.3	38260.3	23022.5	ab	16112.7	61.3154	41.7123	80.9186	0.3
SweetPotato-IO	Time to first sustained E2 from start of recording	9	2773.09	8141.06	5764.71	b	1595.27	41.0804	38.3886	43.7723	0.3
Cassava-SSA1_SG3	Time to first sustained E2 from start of first probe	36	1938.12	34293.3	14293.5	a	9367.41	52.442	48.2432	56.6408	0.3
SweetPotato-SSA1_SG3	Time to first sustained E2 from start of first probe	15	924.12	35803.2	17702.5	a	10685	55.9013	48.2911	63.5116	0.3
Tomato-SSA1_SG3	Time to first sustained E2 from start of first probe	14	1454.07	28596.6	10386.3	ab	7161.34	47.5388	41.5603	53.5172	0.3
Cotton-SSA1_SG3	Time to first sustained E2 from start of first probe	14	4408.66	39846.2	20032.6	a	11096.4	59.4047	53.0138	65.7955	0.3
Cassava-MED	Time to first sustained E2 from start of first probe	14	3798.02	40061.5	17464.9	a	11706.8	56.2503	49.458	63.0427	0.3
SweetPotato-MED	Time to first sustained E2 from start of first probe	15	1360.52	26522.9	10294.6	ab	6944.62	47.3547	41.5248	53.1846	0.3
Cassava-IO	Time to first sustained E2 from start of first probe	3	6126.05	38090.2	22927.9	ab	16045	61.2334	41.6459	80.8209	0.3
SweetPotato-IO	Time to first sustained E2 from start of first probe	9	2726.85	8080.69	5686.01	b	1588.05	40.8924	38.1936	43.5912	0.3
Cassava-SSA1_SG3	Time to first sustained E2 from start of that probe	36	438.42	4603.69	2106.93	a	1084.93	4.49742	4.4343	4.5605	-0.15
SweetPotato-SSA1_SG3	Time to first sustained E2 from start of that probe	15	924.12	4150.78	1872.3	a	905.394	4.47722	4.4023	4.5522	-0.15
Tomato-SSA1_SG3	Time to first sustained E2 from start of that probe	14	577.74	2862.89	1243.6	a	604.072	4.34171	4.2637	4.4198	-0.15
Cotton-SSA1_SG3	Time to first sustained E2 from start of that probe	14	706.4	7372.87	2139.26	a	1684.69	4.48434	4.3799	4.5887	-0.15
Cassava-MED	Time to first sustained E2 from start of that probe	14	528.88	2421.08	1404.13	a	621.23	4.37969	4.2922	4.4672	-0.15
SweetPotato-MED	Time to first sustained E2 from start of that probe	15	603.37	3896.72	1468.22	a	909.265	4.37741	4.2843	4.4706	-0.15
Cassava-IO	Time to first sustained E2 from start of that probe	3	781.61	2105.24	1231.1	a	757.127	4.32937	4.1094	4.5493	-0.15
SweetPotato-IO	Time to first sustained E2 from start of that probe	9	710.43	3622.59	1497.74	a	1058.2	4.37518	4.2492	4.5011	-0.15
Cassava-SSA1_SG3	Time to first sustained G from start of first probe	21	157.68	33139.1	8687.89	a	8708.77	42.2359	35.728	48.7438	0.3
SweetPotato-SSA1_SG3	Time to first sustained G from start of first probe	11	2549.39	37204.5	10638.8	a	9844.16	47.529	40.4045	54.6535	0.3
Tomato-SSA1_SG3	Time to first sustained G from start of first probe	12	1364.38	28354.9	10393.1	a	8995.85	45.7534	37.4296	54.0772	0.3
Cotton-SSA1_SG3	Time to first sustained G from start of first probe	8	1118.11	34421.5	12786	a	9689.73	50.1715	40.5778	59.7652	0.3
Cassava-MED	Time to first sustained G from start of first probe	23	253.59	31729.2	11547.2	a	9399.39	47.4673	41.0845	53.8502	0.3
SweetPotato-MED	Time to first sustained G from start of first probe	5	3419.16	28813.4	11035.5	ab	10465.2	47.5372	35.093	59.9813	0.3
Cassava-IO	Time to first sustained G from start of first probe	5	570.24	15669.5	9027.06	ab	6473.06	44.0164	30.0079	58.025	0.3
SweetPotato-IO	Time to first sustained G from start of first probe	1	2370.22	2370.22	2370.22	b		30.9727			0.3
Cassava-SSA1_SG3	Time from Last E2 to end of EPG record	27	1177.02	40670.8	21534.9	a	12283.7	0.4468	0.3962	0.4974	-0.85	Yes
SweetPotato-SSA1_SG3	Time from Last E2 to end of EPG record	10	1048.89	23059.8	8271.11	bc	6247.84	0.301695	0.2399	0.3635	-0.85	Yes
Tomato-SSA1_SG3	Time from Last E2 to end of EPG record	5	210.09	4614.68	1910.72	cd	1745.23	0.140513	0.05119	0.2298	-0.85	Yes
Cotton-SSA1_SG3	Time from Last E2 to end of EPG record	8	2438.43	27901.1	11818.1	ab	9027.93	0.343169	0.2584	0.428	-0.85	Yes
Cassava-MED	Time from Last E2 to end of EPG record	3	574.25	2947.18	1396.03	d	1344.13	0.13204	0.05205	0.212	-0.85	Yes
SweetPotato-MED	Time from Last E2 to end of EPG record	8	313.03	33546.8	10884.2	acd	12090	0.306452	0.1908	0.4221	-0.85	Yes
Cassava-IO	Time from Last E2 to end of EPG record	0									-0.85	Yes
SweetPotato-IO	Time from Last E2 to end of EPG record	7	2005.33	38919.9	8714.15	acd	13410.6	0.282327	0.1693	0.3954	-0.85	Yes
Cassava-SSA1_SG3	Time from end of last pd to end of EPG record	40	28.37	40839.4	15657.7	a	13738.1	0.28319	0.2389	0.3275	-1.7	Yes
SweetPotato-SSA1_SG3	Time from end of last pd to end of EPG record	15	2502.41	39362.2	12430.2	a	10764.2	0.296604	0.2577	0.3356	-1.7	Yes
Tomato-SSA1_SG3	Time from end of last pd to end of EPG record	15	10.92	32943.9	4436.54	bcd	8372.16	0.162681	0.1058	0.2196	-1.7	Yes
Cotton-SSA1_SG3	Time from end of last pd to end of EPG record	14	242.79	28122.1	8223.17	ab	8195.29	0.244846	0.1949	0.2948	-1.7	Yes
Cassava-MED	Time from end of last pd to end of EPG record	28	87.17	12919.1	2031.01	c	2655.63	0.142764	0.1167	0.1688	-1.7	Yes
SweetPotato-MED	Time from end of last pd to end of EPG record	15	1.03	33689.3	7373.07	ac	9885.71	0.208912	0.1451	0.2727	-1.7	Yes
Cassava-IO	Time from end of last pd to end of EPG record	5	78.21	833	407.022	d	278.375	0.0826778	0.05726	0.1081	-1.7	Yes
SweetPotato-IO	Time from end of last pd to end of EPG record	9	107.43	39091.8	7087.97	acd	12192.2	0.207669	0.1299	0.2855	-1.7	Yes
Cassava-SSA1_SG3	Time from start of EPG to 1st E	40	2088.93	39383.4	11790.5	a	10098.2	0.329343	0.2888	0.3699	-0.85	Yes
SweetPotato-SSA1_SG3	Time from start of EPG to 1st E	15	1098.08	35813	18070	a	10863.6	0.399037	0.3202	0.4778	-0.85	Yes
Tomato-SSA1_SG3	Time from start of EPG to 1st E	15	2231.35	35352	16444.7	a	10506.5	0.390397	0.3245	0.4563	-0.85	Yes
Cotton-SSA1_SG3	Time from start of EPG to 1st E	14	2248.75	40092.8	14171.1	a	9894.83	0.372548	0.3076	0.4375	-0.85	Yes
Cassava-MED	Time from start of EPG to 1st E	27	1782.36	38449.8	16102.8	a	11063.4	0.385505	0.3357	0.4353	-0.85	Yes
SweetPotato-MED	Time from start of EPG to 1st E	15	1502.03	26495.2	9420.68	ab	6492.21	0.302437	0.2435	0.3614	-0.85	Yes
Cassava-IO	Time from start of EPG to 1st E	5	3831.75	27803	14373.1	ab	11192.5	0.365865	0.2473	0.4844	-0.85	Yes
SweetPotato-IO	Time from start of EPG to 1st E	9	2062.82	6460.22	4555.67	b	1651.79	0.228625	0.1946	0.2627	-0.85	Yes
Cassava-SSA1_SG3	Total duration of non-phloematic phase (recording duration minus total duration E1 and E2)	40	2490.9	43018.7	21872.7	ab	12977.9	0.659509	0.5676	0.7514	0.45	Yes
SweetPotato-SSA1_SG3	Total duration of non-phloematic phase (recording duration minus total duration E1 and E2)	15	9531.5	38486.8	27428.7	b	8475.97	0.566421	0.4802	0.6526	0.45	Yes
Tomato-SSA1_SG3	Total duration of non-phloematic phase (recording duration minus total duration E1 and E2)	15	14246.5	42729.8	31379	b	7661.41	0.474717	0.3834	0.566	0.45	Yes
Cotton-SSA1_SG3	Total duration of non-phloematic phase (recording duration minus total duration E1 and E2)	14	8266.36	41666.5	27326.6	b	10321.7	0.556014	0.4383	0.6737	0.45	Yes
Cassava-MED	Total duration of non-phloematic phase (recording duration minus total duration E1 and E2)	27	18379	43187.8	39460.3	c	6288.32	0.215026	0.1423	0.2878	0.45	Yes
SweetPotato-MED	Total duration of non-phloematic phase (recording duration minus total duration E1 and E2)	15	9412.26	39207.7	22735.3	ab	8457.48	0.658226	0.5734	0.7431	0.45	Yes
Cassava-IO	Total duration of non-phloematic phase (recording duration minus total duration E1 and E2)	5	41550.6	43103	42281.5	c	716.372	0.130311	0.07143	0.1892	0.45	Yes
SweetPotato-IO	Total duration of non-phloematic phase (recording duration minus total duration E1 and E2)	9	4241.41	23833	15493.4	a	6527	0.800537	0.7148	0.8863	0.45	Yes
Cassava-SSA1_SG3	Total duration of C	40	1268	35409.4	12200.8	b	8351.78	0.378058	0.3325	0.4236	-0.6	Yes
SweetPotato-SSA1_SG3	Total duration of C	15	3289.63	15974.6	8018.37	b	3708.85	0.326183	0.2874	0.3649	-0.6	Yes
Tomato-SSA1_SG3	Total duration of C	15	3781.21	18948.7	10280.9	b	4530.73	0.368109	0.3277	0.4085	-0.6	Yes
Cotton-SSA1_SG3	Total duration of C	14	4672.54	16795.7	10426.9	b	3619.3	0.374581	0.3402	0.409	-0.6	Yes
Cassava-MED	Total duration of C	28	10295	33230.3	23493.1	a	7103.1	0.544682	0.5138	0.5755	-0.6	Yes
SweetPotato-MED	Total duration of C	15	4935.46	18917	11736.4	b	4508.08	0.394105	0.3575	0.4307	-0.6	Yes
Cassava-IO	Total duration of C	5	19222.2	30809	24282.2	a	4966.71	0.555006	0.5071	0.6029	-0.6	Yes
SweetPotato-IO	Total duration of C	9	3624.8	15521.4	10386.2	b	4143.58	0.37088	0.3193	0.4224	-0.6	Yes
Cassava-SSA1_SG3	Total duration of E	40	181.3	40709.1	21327.3	ab	12977.9	0.659509	0.5676	0.7514	0.45	Yes
SweetPotato-SSA1_SG3	Total duration of E	15	4713.21	33668.5	15771.3	b	8475.97	0.566421	0.4802	0.6526	0.45	Yes
Tomato-SSA1_SG3	Total duration of E	15	470.21	28953.5	11821	b	7661.41	0.474717	0.3834	0.566	0.45	Yes
Cotton-SSA1_SG3	Total duration of E	14	1533.52	34933.6	15873.4	b	10321.7	0.556014	0.4383	0.6737	0.45	Yes
Cassava-MED	Total duration of E	27	12.23	24821	3739.72	c	6288.32	0.215026	0.1423	0.2878	0.45	Yes
SweetPotato-MED	Total duration of E	15	3992.32	33787.7	20464.7	ab	8457.48	0.658226	0.5734	0.7431	0.45	Yes
Cassava-IO	Total duration of E	5	97.04	1649.41	918.504	c	716.372	0.130311	0.07143	0.1892	0.45	Yes
SweetPotato-IO	Total duration of E	9	19367	38958.6	27706.6	a	6527	0.800537	0.7148	0.8863	0.45	Yes
Cassava-SSA1_SG3	Total duration of E1	40	18.47	1021.36	206.775	b	227.597	0.100498	0.08982	0.1112	-4.5	Yes
SweetPotato-SSA1_SG3	Total duration of E1	15	33.49	1025.89	266.335	b	307.038	0.106896	0.08775	0.126	-4.5	Yes
Tomato-SSA1_SG3	Total duration of E1	15	59.83	4704.43	1049.67	a	1242.42	0.151352	0.1312	0.1715	-4.5	Yes
Cotton-SSA1_SG3	Total duration of E1	14	28.06	6609.91	691.922	ab	1731.63	0.110466	0.08547	0.1355	-4.5	Yes
Cassava-MED	Total duration of E1	28	0	1833.47	410.214	ab	491.856	0.115595	0.09765	0.1335	-4.5	Yes
SweetPotato-MED	Total duration of E1	15	41.48	991.46	317.661	ab	251.712	0.120549	0.1043	0.1368	-4.5	Yes
Cassava-IO	Total duration of E1	5	97.04	342.07	218.132	ab	94.1882	0.114957	0.0995	0.1304	-4.5	Yes
SweetPotato-IO	Total duration of E1	9	38.65	2318.97	779.192	ab	747.779	0.145178	0.1176	0.1727	-4.5	Yes
Cassava-SSA1_SG3	Total duration of E1 followed by E2	38	13.8	499.17	89.8674	b	99.7952	0.0772157	0.06644	0.08799	-4.85	Yes
SweetPotato-SSA1_SG3	Total duration of E1 followed by E2	15	33.49	1025.89	266.335	ab	307.038	0.111747	0.09146	0.132	-4.85	Yes
Tomato-SSA1_SG3	Total duration of E1 followed by E2	15	34.87	3114.45	641.918	a	837.304	0.139489	0.1201	0.1589	-4.85	Yes
Cotton-SSA1_SG3	Total duration of E1 followed by E2	14	28.06	4419.51	482.928	ab	1144.29	0.110829	0.08724	0.1344	-4.85	Yes
Cassava-MED	Total duration of E1 followed by E2	18	26.8	741.15	199.16	ab	184.58	0.107096	0.09008	0.1241	-4.85	Yes
SweetPotato-MED	Total duration of E1 followed by E2	15	41.48	624.69	228.021	a	179.002	0.116881	0.1017	0.1321	-4.85	Yes
Cassava-IO	Total duration of E1 followed by E2	3	30.77	147.68	87.4267	ab	58.5379	0.0848789	0.05031	0.1194	-4.85	Yes
SweetPotato-IO	Total duration of E1 followed by E2	9	38.65	1984.53	494.071	a	600.533	0.134986	0.1105	0.1595	-4.85	Yes
Cassava-SSA1_SG3	Total Duration of E1 followed by a sustained E2	36	13.8	379.59	69.8858	cd	69.2714	0.0835992	0.07311	0.09409	-4.8	Yes
SweetPotato-SSA1_SG3	Total Duration of E1 followed by a sustained E2	15	33.49	1025.89	227.389	ab	293.132	0.118665	0.09887	0.1385	-4.8	Yes
Tomato-SSA1_SG3	Total Duration of E1 followed by a sustained E2	14	73.75	2876.11	389.359	a	722.121	0.138309	0.1235	0.1531	-4.8	Yes
Cotton-SSA1_SG3	Total Duration of E1 followed by a sustained E2	14	28.06	627.41	158.346	ac	168.591	0.109664	0.08863	0.1307	-4.8	Yes
Cassava-MED	Total Duration of E1 followed by a sustained E2	14	23.82	245.7	97.65	bcd	70.8118	0.100251	0.08421	0.1163	-4.8	Yes
SweetPotato-MED	Total Duration of E1 followed by a sustained E2	15	30.61	473.25	179.497	ab	135.834	0.123493	0.108	0.1389	-4.8	Yes
Cassava-IO	Total Duration of E1 followed by a sustained E2	3	30.77	49.2	38.19	d	9.72534	0.0710177	0.05889	0.08314	-4.8	Yes
SweetPotato-IO	Total Duration of E1 followed by a sustained E2	9	38.65	709.74	257.454	ab	196.866	0.137477	0.1177	0.1572	-4.8	Yes
Cassava-SSA1_SG3	Total duration of E1 followed by E2 plus E2	38	363.84	40693.4	22322	ab	12433.6	0.719434	0.6223	0.8165	0.6	Yes
SweetPotato-SSA1_SG3	Total duration of E1 followed by E2 plus E2	15	4713.21	33668.5	15771.3	bc	8475.97	0.587059	0.4926	0.6815	0.6	Yes
Tomato-SSA1_SG3	Total duration of E1 followed by E2 plus E2	15	445.25	28741.6	11413.3	cd	7620.18	0.47553	0.3747	0.5764	0.6	Yes
Cotton-SSA1_SG3	Total duration of E1 followed by E2 plus E2	14	1533.52	34933.6	15664.4	bc	10363	0.571384	0.4421	0.7006	0.6	Yes
Cassava-MED	Total duration of E1 followed by E2 plus E2	18	279.03	24793.7	5170.63	de	7132.34	0.272278	0.1742	0.3704	0.6	Yes
SweetPotato-MED	Total duration of E1 followed by E2 plus E2	15	3992.32	33764.8	20375	ac	8451.58	0.685752	0.5925	0.779	0.6	Yes
Cassava-IO	Total duration of E1 followed by E2 plus E2	3	759.24	1576.38	1254.71	e	435.415	0.148408	0.107	0.1898	0.6	Yes
SweetPotato-IO	Total duration of E1 followed by E2 plus E2	9	18641.2	38958.6	27421.4	a	6814.79	0.839022	0.7395	0.9386	0.6	Yes
Cassava-SSA1_SG3	Total Duration of E2	40	0	40670.8	21120.5	ac	13092	0.661935	0.5636	0.7603	0.5	Yes
SweetPotato-SSA1_SG3	Total Duration of E2	15	3856.13	33635	15505	bc	8530.29	0.568676	0.4787	0.6586	0.5	Yes
Tomato-SSA1_SG3	Total Duration of E2	15	410.38	28462.5	10771.3	c	7488.55	0.456264	0.3636	0.549	0.5	Yes
Cotton-SSA1_SG3	Total Duration of E2	14	1410.93	34842.6	15181.4	bc	10558.9	0.548391	0.4247	0.6721	0.5	Yes
Cassava-MED	Total Duration of E2	28	0	24762.9	3195.94	d	6152.04	0.176534	0.09999	0.2531	0.5	Yes
SweetPotato-MED	Total Duration of E2	15	3906.37	33548.5	20147	ab	8448.37	0.663062	0.5758	0.7503	0.5	Yes
Cassava-IO	Total Duration of E2	5	0	1492.55	700.372	d	697.553	0.0970741	0.01671	0.1774	0.5	Yes
SweetPotato-IO	Total Duration of E2	9	17067.3	38919.9	26927.4	a	7152.83	0.801232	0.705	0.8974	0.5	Yes
Cassava-SSA1_SG3	Total duration of F	40	0	12532.3	2295.09	c	3241.36	21.2716	15.9653	26.5779	0.3
SweetPotato-SSA1_SG3	Total duration of F	15	0	13139.4	6969.03	ab	4531.88	40.0728	32.5408	47.6047	0.3
Tomato-SSA1_SG3	Total duration of F	15	0	10479.2	2837.12	ac	2866.44	27.8148	20.6831	34.9465	0.3
Cotton-SSA1_SG3	Total duration of F	14	740.24	9722.44	5952.12	a	2863.25	40.4621	36.2176	44.7065	0.3
Cassava-MED	Total duration of F	28	0	14323.3	2947.92	bc	3295.24	26.8483	21.074	32.6227	0.3
SweetPotato-MED	Total duration of F	15	0	6616.28	2110.4	bc	2030.5	25.4156	19.0278	31.8034	0.3
Cassava-IO	Total duration of F	5	0	14717.8	4008.65	ac	6144.56	26.8237	8.376	45.2715	0.3
SweetPotato-IO	Total duration of F	9	0	3852.55	1719.36	bc	1730.13	20.8371	10.6364	31.0377	0.3
Cassava-SSA1_SG3	Total duration of NP	40	260.03	13101.3	4143.58	bc	3304.12	34.5602	31.513	37.6074	0.3
SweetPotato-SSA1_SG3	Total duration of NP	15	1882.69	23330.7	7507.05	ac	5525.12	43.137	38.4585	47.8155	0.3
Tomato-SSA1_SG3	Total duration of NP	15	1893.28	30980.3	13561	a	7669.78	52.2078	46.316	58.0997	0.3
Cotton-SSA1_SG3	Total duration of NP	14	172.48	18965	7366.28	ab	6690.76	40.1203	32.281	47.9596	0.3
Cassava-MED	Total duration of NP	28	2396.13	21898.4	9320.41	a	4992.12	46.9796	43.9922	49.9671	0.3
SweetPotato-MED	Total duration of NP	15	1534.78	18876.3	8155.33	ab	5925.92	43.3514	37.329	49.3737	0.3
Cassava-IO	Total duration of NP	5	1360.34	18811.2	10642.1	ab	6861.56	47.5731	35.5329	59.6133	0.3
SweetPotato-IO	Total duration of NP	9	616.61	6434.21	2903.72	b	1940.12	31.3346	26.0386	36.6305	0.3
Cassava-SSA1_SG3	Total duration of PD	40	28.75	1235.55	270.177	ab	235.999	8.14156	7.5454	8.7377	0.15
SweetPotato-SSA1_SG3	Total duration of PD	15	17.33	147.4	61.3193	c	39.265	5.45316	4.8818	6.0245	0.15
Tomato-SSA1_SG3	Total duration of PD	15	16.82	342.65	154.55	bc	112.85	7.00978	6.1066	7.9129	0.15
Cotton-SSA1_SG3	Total duration of PD	14	24.66	235.15	109.992	c	70.0158	6.45584	5.6802	7.2315	0.15
Cassava-MED	Total duration of PD	28	33.35	705.1	352.329	a	190.015	9.02593	8.4268	9.6251	0.15
SweetPotato-MED	Total duration of PD	15	8.55	280.9	131.233	bc	74.4606	6.8363	6.0522	7.6204	0.15
Cassava-IO	Total duration of PD	5	159.03	712.14	416.64	a	227.743	9.52015	8.1863	10.854	0.15
SweetPotato-IO	Total duration of PD	9	28.43	216.5	135.517	bc	69.7347	6.97939	6.0841	7.8746	0.15
Cassava-SSA1_SG3	Total duration of single E1	27	15.67	1007.56	169.91	a	212.359	0.172976	0.1455	0.2005	-2.4	Yes
SweetPotato-SSA1_SG3	Total duration of single E1	0									-2.4	Yes
Tomato-SSA1_SG3	Total duration of single E1	12	23.94	1357.58	473.579	a	447.606	0.243783	0.1921	0.2954	-2.4	Yes
Cotton-SSA1_SG3	Total duration of single E1	4	42.31	1479.25	553.692	a	673.023	0.233655	0.1106	0.3567	-2.4	Yes
Cassava-MED	Total duration of single E1	22	12.23	1324.79	301.331	a	375.915	0.196197	0.1561	0.2363	-2.4	Yes
SweetPotato-MED	Total duration of single E1	8	17.42	366.77	156.536	a	133.123	0.169884	0.1125	0.2273	-2.4	Yes
Cassava-IO	Total duration of single E1	5	39.89	247.95	111.394	a	79.9849	0.167244	0.1274	0.2071	-2.4	Yes
SweetPotato-IO	Total duration of single E1	7	34.82	1240.89	366.584	a	458.113	0.208953	0.1347	0.2832	-2.4	Yes
Cassava-SSA1_SG3	Total probing time	40	30098.7	42940	39056.4	bc	3304.12	44.9056	40.0694	49.7418	0.35
SweetPotato-SSA1_SG3	Total probing time	15	19869.3	41317.3	35692.9	ac	5525.12	58.4985	51.0395	65.9574	0.35
Tomato-SSA1_SG3	Total probing time	15	12219.7	41306.7	29639	a	7669.78	73.0646	63.6322	82.4969	0.35
Cotton-SSA1_SG3	Total probing time	14	24235	43027.5	35833.7	ab	6690.76	53.0842	39.8365	66.3318	0.35
Cassava-MED	Total probing time	28	21301.6	40803.9	33879.6	a	4992.12	64.5691	59.7929	69.3453	0.35
SweetPotato-MED	Total probing time	15	24323.7	41665.2	35044.7	ab	5925.92	58.9137	49.382	68.4454	0.35
Cassava-IO	Total probing time	5	24388.8	41839.7	32557.9	ab	6861.56	65.6382	46.5716	84.7048	0.35
SweetPotato-IO	Total probing time	9	36765.8	42583.4	40296.3	b	1940.12	39.8819	31.5768	48.187	0.35
Cassava-SSA1_SG3	Duration of longest E2	38	278.21	40670.8	19704.9	a	12616.3	0.469795	0.4105	0.5291	-0.45	Yes
SweetPotato-SSA1_SG3	Duration of longest E2	15	1048.89	33635	11786.3	ab	8297.43	0.381818	0.3189	0.4447	-0.45	Yes
Tomato-SSA1_SG3	Duration of longest E2	15	410.38	14766.8	5360.83	bc	4265.04	0.260896	0.205	0.3168	-0.45	Yes
Cotton-SSA1_SG3	Duration of longest E2	14	1136.85	31561.4	12500.2	ab	9364.15	0.381708	0.3036	0.4598	-0.45	Yes
Cassava-MED	Duration of longest E2	18	251.18	24762.9	3816.7	cd	6459.35	0.177679	0.1083	0.247	-0.45	Yes
SweetPotato-MED	Duration of longest E2	15	2890.09	33546.8	13086.8	a	8637.63	0.404237	0.3455	0.463	-0.45	Yes
Cassava-IO	Duration of longest E2	3	728.47	1443.24	1063.65	d	359.448	0.126818	0.0967	0.1569	-0.45	Yes
SweetPotato-IO	Duration of longest E2	9	5497.28	38919.9	13634.2	a	10048	0.416766	0.3353	0.4982	-0.45	Yes
Cassava-SSA1_SG3	Mean duration of F	29	60.88	2991.34	1159.67	ab	802.128	18.0465	16.277	19.8159	0.25
SweetPotato-SSA1_SG3	Mean duration of F	14	434.834	2714.18	1206.62	a	576.798	19.1257	17.6568	20.5947	0.25
Tomato-SSA1_SG3	Mean duration of F	13	486.42	3493.07	1398.59	a	889.501	19.6312	17.5356	21.7267	0.25
Cotton-SSA1_SG3	Mean duration of F	14	370.12	2572.82	1385.49	a	752.578	19.6461	17.6619	21.6303	0.25
Cassava-MED	Mean duration of F	23	270.68	1790.41	653.936	bc	392.803	15.6744	14.5365	16.8123	0.25
SweetPotato-MED	Mean duration of F	13	270.955	3545.42	841.789	ac	864.09	16.3989	14.2482	18.5497	0.25
Cassava-IO	Mean duration of F	4	143.25	1195.07	761.21	ac	470.98	16.1033	11.752	20.4546	0.25
SweetPotato-IO	Mean duration of F	7	79.03	858.298	391.202	c	255.259	13.1199	10.7731	15.4667	0.25
Cassava-SSA1_SG3	Mean number of G per probe	22	0.0434783	0.631579	0.159583	a	0.136844	0.0912211	0.07423	0.1082	-5
SweetPotato-SSA1_SG3	Mean number of G per probe	11	0.0227273	0.235294	0.0878817	ab	0.0615881	0.0636449	0.04404	0.08325	-5
Tomato-SSA1_SG3	Mean number of G per probe	12	0.0322581	0.333333	0.10707	ab	0.0812288	0.072683	0.05311	0.09226	-5
Cotton-SSA1_SG3	Mean number of G per probe	8	0.0151515	0.173913	0.10523	ab	0.0467226	0.0756453	0.05537	0.09592	-5
Cassava-MED	Mean number of G per probe	28	0.0172414	0.416667	0.146517	a	0.131511	0.0829664	0.06478	0.1012	-5
SweetPotato-MED	Mean number of G per probe	6	0.0243902	0.08	0.0542686	b	0.0212026	0.0456629	0.03306	0.05827	-5
Cassava-IO	Mean number of G per probe	5	0.0377358	0.294118	0.110527	ab	0.106215	0.0708808	0.03079	0.111	-5
SweetPotato-IO	Mean number of G per probe	1	0.0857143	0.0857143	0.0857143	a		0.0674279			-5
Cassava-SSA1_SG3	Mean number of pd per probe	40	0.5	6.6	2.9484	a	1.63309	1.20165	1.0856	1.3177	-0.1
SweetPotato-SSA1_SG3	Mean number of pd per probe	15	0.155556	2	0.49388	c	0.450781	0.361886	0.2489	0.4749	-0.1
Tomato-SSA1_SG3	Mean number of pd per probe	15	0.285714	5.33333	1.83005	ab	1.49968	0.871324	0.6442	1.0985	-0.1
Cotton-SSA1_SG3	Mean number of pd per probe	14	0.106061	5.5	1.30682	bc	1.37022	0.685174	0.4592	0.9112	-0.1
Cassava-MED	Mean number of pd per probe	28	0.12069	3.89286	2.0191	ab	0.906072	0.999336	0.8895	1.1092	-0.1
SweetPotato-MED	Mean number of pd per probe	15	0.125	2.84	1.23057	b	0.696446	0.726928	0.5827	0.8711	-0.1
Cassava-IO	Mean number of pd per probe	5	0.565217	2.76471	1.9214	ab	0.96409	0.963901	0.6565	1.2713	-0.1
SweetPotato-IO	Mean number of pd per probe	9	0.535714	4.38462	1.84514	ab	1.09736	0.934707	0.7221	1.1474	-0.1
Cassava-SSA1_SG3	Mean duration of pd	40	3.99811	8.78158	6.0477	a	1.08181	1.46978	1.4437	1.4959	-0.3
SweetPotato-SSA1_SG3	Mean duration of pd	15	2.80857	6.07333	4.29947	bc	0.980503	1.29927	1.2407	1.3578	-0.3
Tomato-SSA1_SG3	Mean duration of pd	15	3.40385	5.51353	4.41648	bc	0.628101	1.32045	1.2849	1.356	-0.3
Cotton-SSA1_SG3	Mean duration of pd	14	4.04548	7.58548	5.12768	ab	1.01961	1.38959	1.3428	1.4364	-0.3
Cassava-MED	Mean duration of pd	28	3.29342	7.70265	5.04226	b	1.05988	1.37957	1.343	1.4161	-0.3
SweetPotato-MED	Mean duration of pd	15	2.76952	4.52297	3.81542	cd	0.534452	1.24821	1.2106	1.2858	-0.3
Cassava-IO	Mean duration of pd	5	3.38362	8.34769	5.62586	abc	1.84025	1.42022	1.2786	1.5618	-0.3
SweetPotato-IO	Mean duration of pd	9	2.66667	3.85843	3.32091	d	0.365703	1.18171	1.1446	1.2189	-0.3
Cassava-SSA1_SG3	Standard Deviation of duration of C	40	71.0131	384.775	150.38	ab	75.1969	1.29846	1.2953	1.3016	-0.75
SweetPotato-SSA1_SG3	Standard Deviation of duration of C	15	82.7905	252.808	145.837	ab	53.3076	1.29923	1.2948	1.3036	-0.75
Tomato-SSA1_SG3	Standard Deviation of duration of C	15	78.9764	204.891	122.331	b	32.3908	1.29592	1.2925	1.2994	-0.75
Cotton-SSA1_SG3	Standard Deviation of duration of C	14	74.2722	455.291	224.243	ab	111.605	1.30624	1.3001	1.3123	-0.75
Cassava-MED	Standard Deviation of duration of C	28	98.9397	632.887	207.742	a	121.923	1.30505	1.3017	1.3084	-0.75
SweetPotato-MED	Standard Deviation of duration of C	15	84.9731	580.266	192.946	ab	120.982	1.30332	1.2981	1.3085	-0.75
Cassava-IO	Standard Deviation of duration of C	5	96.7971	384.881	188.348	ab	118.038	1.30266	1.293	1.3123	-0.75
SweetPotato-IO	Standard Deviation of duration of C	9	85.1113	423.096	142.714	ab	108.685	1.2953	1.2881	1.3025	-0.75
Cassava-SSA1_SG3	Standard Deviation of duration of E1	31	2.22739	390.72	38.6265	a	70.1706	3.00608	2.6156	3.3966	0
SweetPotato-SSA1_SG3	Standard Deviation of duration of E1	11	6.9256	272.318	90.7285	a	90.0122	3.95452	3.2171	4.692	0
Tomato-SSA1_SG3	Standard Deviation of duration of E1	15	7.00743	338.153	86.6173	a	98.9714	3.89409	3.3049	4.4833	0
Cotton-SSA1_SG3	Standard Deviation of duration of E1	11	6.14476	334.254	75.9587	a	118.748	3.47504	2.6967	4.2534	0
Cassava-MED	Standard Deviation of duration of E1	20	2.34759	516.591	113.048	a	150.978	3.86435	3.1856	4.5431	0
SweetPotato-MED	Standard Deviation of duration of E1	14	0.13435	90.7625	32.2613	a	25.512	3.09751	2.4918	3.7032	0
Cassava-IO	Standard Deviation of duration of E1	3	15.9551	124.047	53.1328	a	61.4375	3.55821	2.2942	4.8222	0
SweetPotato-IO	Standard Deviation of duration of E1	8	9.55346	220.923	71.1797	a	80.1216	3.69021	2.8577	4.5227	0
Cassava-SSA1_SG3	Standard Deviation of duration of E2	23	43.9043	22408.7	7358.84	a	6836.24	21.8712	18.8796	24.8628	0.2	Yes
SweetPotato-SSA1_SG3	Standard Deviation of duration of E2	11	353.355	16291.4	5157.04	a	4386.51	21.1508	18.2134	24.0881	0.2	Yes
Tomato-SSA1_SG3	Standard Deviation of duration of E2	14	247.821	6137.89	2297.8	ab	1860.51	17.2697	15.1091	19.4302	0.2	Yes
Cotton-SSA1_SG3	Standard Deviation of duration of E2	11	610.071	19997.1	5859.83	a	5562.73	21.3647	17.952	24.7773	0.2	Yes
Cassava-MED	Standard Deviation of duration of E2	13	121.192	7534.9	1445.2	b	2091.01	13.8691	11.0257	16.7125	0.2	Yes
SweetPotato-MED	Standard Deviation of duration of E2	14	443.066	18109.6	5906.45	a	5430.11	21.726	19.0382	24.4139	0.2	Yes
Cassava-IO	Standard Deviation of duration of E2	2	514.776	985.657	750.217	b	332.963	13.6443	11.2443	16.0443	0.2	Yes
SweetPotato-IO	Standard Deviation of duration of E2	8	1763.15	5666.35	3859.5	a	1384.48	20.8121	19.3799	22.2444	0.2	Yes
Cassava-SSA1_SG3	Standard Deviation of duration of F	15	91.3653	2456.36	1111.76	a	627.259	22.8374	19.9238	25.7509	0.3
SweetPotato-SSA1_SG3	Standard Deviation of duration of F	13	278.746	1413.01	892.489	a	295.264	21.9317	20.3374	23.526	0.3
Tomato-SSA1_SG3	Standard Deviation of duration of F	9	415.779	3188.52	1413.13	a	992.179	24.514	20.1365	28.8915	0.3
Cotton-SSA1_SG3	Standard Deviation of duration of F	13	56.3564	2413.82	993.762	ab	732.223	21.3431	17.6231	25.0632	0.3
Cassava-MED	Standard Deviation of duration of F	21	5.8902	1691.95	452.219	b	420.384	15.7927	13.2819	18.3034	0.3
SweetPotato-MED	Standard Deviation of duration of F	9	155.453	1269.84	406.549	b	343.357	15.9683	13.2925	18.644	0.3
Cassava-IO	Standard Deviation of duration of F	4	22.4129	786.852	354.04	ab	344.831	13.9177	6.8519	20.9835	0.3
SweetPotato-IO	Standard Deviation of duration of F	5	201.942	518.149	323.572	b	159.827	15.1853	12.766	17.6046	0.3
Cassava-SSA1_SG3	Standard Deviation of duration of G	16	141.153	7036.57	1679	ab	1716.37	12.5169	11.03	14.0037	0.15
SweetPotato-SSA1_SG3	Standard Deviation of duration of G	8	277.801	3310.26	1641.56	ab	1058.44	13.0064	11.4076	14.6052	0.15
Tomato-SSA1_SG3	Standard Deviation of duration of G	8	75.4554	8931.87	2555.25	ab	2882.01	13.1363	10.0941	16.1785	0.15
Cotton-SSA1_SG3	Standard Deviation of duration of G	5	795.665	3828.4	2208.1	a	1287.01	14.043	12.1474	15.9386	0.15
Cassava-MED	Standard Deviation of duration of G	24	24.5012	3427.85	821.178	b	925.712	10.2701	9.0614	11.4787	0.15
SweetPotato-MED	Standard Deviation of duration of G	2	855.203	2981.77	1918.49	ab	1503.71	13.5786	9.7999	17.3573	0.15
Cassava-IO	Standard Deviation of duration of G	5	181.934	1419.51	560.371	ab	519.208	9.89443	7.949	11.8399	0.15
SweetPotato-IO	Standard Deviation of duration of G	1	1179.91	1179.91	1179.91	a		12.5971	12.5971	12.5971	0.15
Cassava-SSA1_SG3	Standard Deviation of duration of NP	40	54.9366	3507.28	369.662	bc	592.938	3.66964	3.5465	3.7928	-0.15
SweetPotato-SSA1_SG3	Standard Deviation of duration of NP	15	135.279	726.242	268.025	b	147.887	3.73683	3.6424	3.8312	-0.15
Tomato-SSA1_SG3	Standard Deviation of duration of NP	15	80.746	17744.4	2351.65	a	4339.55	4.23393	3.9544	4.5135	-0.15
Cotton-SSA1_SG3	Standard Deviation of duration of NP	14	8.41531	2220.94	490.883	abc	647.214	3.66394	3.3112	4.0167	-0.15
Cassava-MED	Standard Deviation of duration of NP	28	68.0644	2486.05	494.095	abc	594.684	3.76672	3.5955	3.938	-0.15
SweetPotato-MED	Standard Deviation of duration of NP	15	53.601	1991.84	535.727	abc	653.265	3.71481	3.4342	3.9954	-0.15
Cassava-IO	Standard Deviation of duration of NP	5	61.8341	948.011	405.791	abc	351.955	3.77639	3.3681	4.1847	-0.15
SweetPotato-IO	Standard Deviation of duration of NP	9	38.1219	274.38	128.078	c	78.9315	3.35167	3.1396	3.5637	-0.15
Cassava-SSA1_SG3	Standard Deviation of duration of Probes	40	1632.43	24746.4	7719.3	a	6050.66	5.77832	5.673	5.8837	-0.1
SweetPotato-SSA1_SG3	Standard Deviation of duration of Probes	15	922.263	7377.95	3247.33	bc	1797.93	5.47505	5.3448	5.6053	-0.1
Tomato-SSA1_SG3	Standard Deviation of duration of Probes	15	963.78	5919.78	2973.46	bc	1236.65	5.4628	5.3586	5.567	-0.1
Cotton-SSA1_SG3	Standard Deviation of duration of Probes	14	1052.46	19116.5	4654.43	ab	4671.2	5.56001	5.387	5.733	-0.1
Cassava-MED	Standard Deviation of duration of Probes	28	421.513	5953.32	1815.17	d	1453.76	5.14722	5.0242	5.2702	-0.1
SweetPotato-MED	Standard Deviation of duration of Probes	15	1268.71	6941.2	3397.91	b	1797.69	5.49992	5.3764	5.6234	-0.1
Cassava-IO	Standard Deviation of duration of Probes	5	533.981	2798.51	1281.25	cd	905.626	5.01842	4.7435	5.2933	-0.1
SweetPotato-IO	Standard Deviation of duration of Probes	9	1724.18	20853.1	5703.59	ab	5859.47	5.65748	5.4578	5.8572	-0.1

## Sheet: EPG-Gold-Platinum
Treatment	Parameter	N	Minimum	Maximum	Mean	Tukey group	Standard deviation	Transformed mean	Lower	Upper	λ	BoxCox(Arcsine(x))
2.5um_Platinum	Contribution of E1 to phloem phase	40	0.0509899	100	8.14104	b	22.8501	0.542831	0.4069	0.6788	-0.7
12.5um_Gold	Contribution of E1 to phloem phase	15	0.381046	100	13.4636	a	27.0724	0.818189	0.6271	1.0092	-0.7
2.5um_Platinum	Number of probes to first E1	40	2	30	9.05	b	6.83111	1.9946	1.8179	2.1713	-0.05
12.5um_Gold	Number of probes to first E1	15	7	79	35.8	a	19.7961	3.16318	2.8964	3.43	-0.05
2.5um_Platinum	Number of probes to first G	22	1	20	7.09091	b	5.72305	2.07049	1.6997	2.4413	0.1
12.5um_Gold	Number of probes to first G	13	3	87	41.2308	a	23.6649	4.247	3.6021	4.8919	0.1
2.5um_Platinum	Duration of E1 followed by first sustained E2	38	13.69	285.36	40.3542	a	46.1079	1.11081	1.1032	1.1184	-0.85
12.5um_Gold	Duration of E1 followed by first sustained E2	14	14.63	177.47	50.7657	a	49.668	1.11594	1.1008	1.1311	-0.85
2.5um_Platinum	Duration of E1 followed by first sustained E2 (Long E2)	36	13.8	213.81	42.4597	a	37.8353	1.11528	1.1076	1.1229	-0.85
12.5um_Gold	Duration of E1 followed by first sustained E2 (Long E2)	12	22.94	74.43	36.2917	a	17.6274	1.11552	1.1056	1.1255	-0.85
2.5um_Platinum	Duration of first E (E1 + E2)	40	15.67	37371.2	7856.97	a	12946	4.35926	3.8731	4.8454	-0.1
12.5um_Gold	Duration of first E (E1 + E2)	15	25.26	8437.5	1783.81	a	2663.32	4.3087	3.6765	4.9409	-0.1
2.5um_Platinum	Duration of First Probe	40	3.11	10358.9	949.085	a	1880.82	6.50732	5.7641	7.2506	0.05
12.5um_Gold	Duration of First Probe	23	9.86	1026.99	231.792	b	272.602	5.36886	4.6583	6.0794	0.05
2.5um_Platinum	Total Time spent in G waveform	40	0	23888.4	3233.23	a	5619.47	5.58765	3.9294	7.2459	0.05
12.5um_Gold	Total Time spent in G waveform	23	0	11211.2	2780.96	a	3697.39	5.77015	3.5829	7.9574	0.05
2.5um_Platinum	Duration of nonprobe period before first E1	40	107.12	11713	2590.43	b	2613.47	8.97018	8.4903	9.4501	0.05
12.5um_Gold	Duration of nonprobe period before first E1	23	301.35	38222.9	10167.4	a	10708.5	10.9606	10.2499	11.6713	0.05
2.5um_Platinum	Duration of nonprobe period before first G	22	256.46	11713	2572.33	b	2715.87	11.119	10.2553	11.9827	0.1
12.5um_Gold	Duration of nonprobe period before first G	13	627.87	14208.9	4813.29	a	3431.72	12.8654	11.8982	13.8327	0.1
2.5um_Platinum	Duration of NP following first sustained E2	18	60.58	6322.6	512.679	a	1453.95	1.82984	1.7975	1.8621	-0.5
12.5um_Gold	Duration of NP following first sustained E2	10	45.82	912.35	289.502	a	305.395	1.83388	1.7845	1.8833	-0.5
2.5um_Platinum	Duration of Second Probe	40	13.6	16140.1	1668.14	a	4093.58	3.22764	3.0505	3.4048	-0.2
12.5um_Gold	Duration of Second Probe	23	8.73	1216.51	153.188	b	266.481	2.74385	2.5094	2.9783	-0.2
2.5um_Platinum	Duration of second non-probe event (z or np)	40	3.12	1241.01	278.132	a	310.355	5.76164	5.2545	6.2687	0.05
12.5um_Gold	Duration of second non-probe event (z or np)	23	6.62	3481.08	376.948	a	789.002	5.35165	4.5421	6.1612	0.05
2.5um_Platinum	Median duration of probes	40	38.92	13606.5	980.007	a	2171.86	3.06489	2.9779	3.1519	-0.25
12.5um_Gold	Median duration of probes	23	31	542.4	166.954	b	134.298	2.80675	2.7251	2.8884	-0.25
2.5um_Platinum	Mean duration of G	22	302.08	7962.81	2219.63	a	1762.76	6.18899	5.9473	6.4306	-0.05
12.5um_Gold	Mean duration of G	13	722.565	11211.2	3367.1	a	3520.32	6.41091	6.0932	6.7286	-0.05
2.5um_Platinum	Mean duration of C	40	253.6	1219.01	617.872	a	238.002	29.6296	28.0338	31.2254	0.4
12.5um_Gold	Mean duration of C	23	42.7761	659.857	269.984	b	132.994	20.2762	18.2322	22.3203	0.4
2.5um_Platinum	Mean Duration of E1	40	18.47	633.46	65.5554	a	106.902	1.06907	1.0634	1.0748	-0.9
12.5um_Gold	Mean Duration of E1	15	20.5	102.84	39.3156	a	19.3341	1.06656	1.06	1.0731	-0.9
2.5um_Platinum	Mean duration of E2	38	165.37	40670.8	15601.9	a	13150	0.353537	0.3061	0.4009	-1.05
12.5um_Gold	Mean duration of E2	14	60.515	11082.9	3852.33	b	3648.33	0.199022	0.1428	0.2553	-1.05
2.5um_Platinum	Mean duration of NP	40	71.3357	2273.72	299.789	a	348.836	1.59746	1.5894	1.6055	-0.6
12.5um_Gold	Mean duration of NP	23	73.841	1233	243.407	b	308.726	1.58098	1.5688	1.5932	-0.6
2.5um_Platinum	Mean duration of probes	40	764.521	14313.3	4074	a	3495.13	9.87041	9.5013	10.2395	0.05
12.5um_Gold	Mean duration of probes	23	51.6355	2602.16	650.856	b	565.818	7.22459	6.7204	7.7288	0.05
2.5um_Platinum	Number of C	40	4	59	20.25	b	12.606	3.09553	2.8593	3.3318	0.05
12.5um_Gold	Number of C	23	19	273	79.4348	a	59.216	4.66044	4.3267	4.9942	0.05
2.5um_Platinum	Number of pd	40	5	169	45.425	a	38.136	5.24466	4.7044	5.7849	0.2
12.5um_Gold	Number of pd	22	1	91	25.6818	b	24.9292	3.93632	3.1163	4.7563	0.2
2.5um_Platinum	Number of short C events	40	0	28	7.125	b	6.54055	1.70044	1.4684	1.9325	-0.05
12.5um_Gold	Number of short C events	23	7	269	55	a	61.128	3.30089	2.9911	3.6106	-0.05
2.5um_Platinum	Number of Probes<3min after first E1	40	0	25	3.175	a	5.06819	0.735096	0.5012	0.969	-0.25
12.5um_Gold	Number of Probes<3min after first E1	23	0	42	8.52174	a	11.1676	1.12393	0.7384	1.5095	-0.25
2.5um_Platinum	Number of Probes<3min after first G	40	0	23	2.875	a	5.07476	0.494729	0.307	0.6825	-0.5
12.5um_Gold	Number of Probes<3min after first G	23	0	52	10.7826	a	15.6407	0.774608	0.4662	1.083	-0.5
2.5um_Platinum	Number of E1	40	1	14	3.8	a	2.98028	1.52964	1.3228	1.7365	0.1
12.5um_Gold	Number of E1	23	0	6	2.21739	b	2.04398	1.00291	0.6623	1.3436	0.1
2.5um_Platinum	Number of E2	40	0	5	1.975	a	1.27073	12.9125	11.0945	14.7305	2
12.5um_Gold	Number of E2	23	0	6	1.43478	a	1.5023	16.0652	13.0101	19.1203	2
2.5um_Platinum	Number of F waveforms	40	0	7	1.7	b	1.78599	0.797464	0.5982	0.9967	0
12.5um_Gold	Number of F waveforms	23	1	17	5.52174	a	3.90652	1.7131	1.4675	1.9587	0
2.5um_Platinum	Number of G	40	0	12	1.5	a	2.2532	0.465328	0.3213	0.6093	-0.55
12.5um_Gold	Number of G	23	0	4	1.04348	a	1.18622	0.424525	0.2561	0.5929	-0.55
2.5um_Platinum	Number of sustained E2	40	0	4	1.5	a	0.9337	0.88979	0.7553	1.0243	0.1
12.5um_Gold	Number of sustained E2	23	0	4	0.956522	b	1.18622	0.543924	0.2956	0.7922	0.1
2.5um_Platinum	Number of sustained G	40	0	9	1.2	a	1.69766	0.424679	0.2884	0.561	-0.55
12.5um_Gold	Number of sustained G	23	0	3	0.956522	a	1.02151	0.413944	0.2517	0.5762	-0.55
2.5um_Platinum	Number of NP	40	3	49	16.325	b	10.4695	2.66009	2.453	2.8672	0
12.5um_Gold	Number of NP	23	15	274	76.3913	a	60.0997	4.1197	3.8359	4.4035	0
2.5um_Platinum	Number of probes	40	3	49	16.275	b	10.4709	2.65533	2.447	2.8636	0
12.5um_Gold	Number of probes	23	15	273	76.1739	a	59.9133	4.11587	3.8311	4.4006	0
2.5um_Platinum	Number of Probes after first E1	40	0	42	7.225	a	8.99426	1.60683	1.2071	2.0066	0.05
12.5um_Gold	Number of Probes after first E1	23	0	64	15	a	17.2864	2.10062	1.3984	2.8028	0.05
2.5um_Platinum	Number of Probes after first G	40	0	38	7.175	a	10.2078	0.990606	0.6731	1.3081	-0.2
12.5um_Gold	Number of Probes after first G	23	0	65	17.0435	a	21.6763	1.31733	0.8088	1.8259	-0.2
2.5um_Platinum	Number of single E1	40	0	12	1.75	a	2.45733	0.511758	0.3849	0.6386	-0.65
12.5um_Gold	Number of single E1	23	0	4	0.782609	b	1.20441	0.288165	0.1283	0.448	-0.65
2.5um_Platinum	Potential E2 Index (E2/(time from start of first E2 to end of recording))	38	1.8062	100	73.6983	b	31.1354	0.346458	0.2412	0.4518	0.25	Yes
12.5um_Gold	Potential E2 Index (E2/(time from start of first E2 to end of recording))	14	0.499145	76.1639	34.104	a	26.7392	0.744158	0.6366	0.8517	0.25	Yes
2.5um_Platinum	Percent E2 spent in Sustained E2	38	0	100	82.6754	a	28.1313	0.777848	0.4207	1.135	-0.3
12.5um_Gold	Percent E2 spent in Sustained E2	14	0	100	66.6667	a	35.8057	1.32788	0.6855	1.9703	-0.3
2.5um_Platinum	Percent probing spent in C	40	2.95296	88.8526	32.2427	b	22.8195	0.477499	0.4069	0.5481	0.45	Yes
12.5um_Gold	Percent probing spent in C	23	15.6876	98.7536	57.6891	a	20.3435	0.717519	0.6429	0.7922	0.45	Yes
2.5um_Platinum	Percent probing spent in E1	40	0.0451938	3.34866	0.559951	a	0.674449	0.23438	0.2053	0.2634	-1.55	Yes
12.5um_Gold	Percent probing spent in E1	23	0	0.730725	0.241094	b	0.237538	0.147545	0.09927	0.1958	-1.55	Yes
2.5um_Platinum	Percent probing spent in E2	40	0	94.7155	52.7374	a	31.4047	0.7095	0.6044	0.8146	0.55	Yes
12.5um_Gold	Percent probing spent in E2	23	0	56.788	14.827	b	19.8316	0.261189	0.1429	0.3794	0.55	Yes
2.5um_Platinum	Percent probing spent in F	40	0	33.0127	5.8782	b	8.21998	1.53886	1.0786	1.9991	0.15
12.5um_Gold	Percent probing spent in F	23	0.429738	45.2785	18.7521	a	11.8563	3.41929	2.8883	3.9503	0.15
2.5um_Platinum	Percent probing spent in G	40	0	56.7617	8.58176	a	14.6942	1.02406	0.7	1.3482	-0.2
12.5um_Gold	Percent probing spent in G	23	0	38.8273	8.49065	a	11.3806	1.11066	0.675	1.5464	-0.2
2.5um_Platinum	Duration of shortest C before first E1 in any probe	40	59.42	4847.41	1505.16	a	1109.11	24.8971	22.7473	27.047	0.3
12.5um_Gold	Duration of shortest C before first E1 in any probe	15	330.77	2270.01	928.488	b	561.119	21.7669	19.5507	23.9832	0.3
2.5um_Platinum	Time from start of probe with first E to 1st E	40	59.42	9244.82	1985.05	a	1706.66	21.1418	19.4421	22.8416	0.25
12.5um_Gold	Time from start of probe with first E to 1st E	15	543.86	3196.11	1511.55	a	789.01	20.3555	18.6813	22.0298	0.25
2.5um_Platinum	Time from start of probe with first G to 1st G	22	90.42	5834.37	1779.25	a	1686.24	15.6914	13.7292	17.6536	0.2
12.5um_Gold	Time from start of probe with first G to 1st G	13	497.84	5292.27	1847.46	a	1589.24	16.3673	14.3134	18.4212	0.2
2.5um_Platinum	Time from end of last pd in probe to end of first probe	40	5.99	40839.4	4341.88	a	10320.4	5.21492	4.7263	5.7035	-0.05
12.5um_Gold	Time from end of last pd in probe to end of first probe	22	1.37	2766.21	580.726	a	819.292	4.62239	4.049	5.1957	-0.05
2.5um_Platinum	Time from end of last pd to beginning of E1 followed by sustained E2	36	60.08	2670.55	299.692	b	434.742	1.59601	1.5882	1.6039	-0.6
12.5um_Gold	Time from end of last pd to beginning of E1 followed by sustained E2	12	125.9	16105	3090.25	a	5501.72	1.61656	1.5993	1.6339	-0.6
2.5um_Platinum	Time from first probe to 1st E	40	1916.77	36782.1	11301		9909.63				-5
12.5um_Gold	Time from first probe to 1st E	15	4467.16	32562.9	17914.3		8121.36				-5
2.5um_Platinum	Time from first probe to 1st G	22	157.68	33139.1	8465.26	b	8484.03	81.038	66.0461	96.0299	0.4
12.5um_Gold	Time from first probe to 1st G	13	1291.58	31598.3	19056.2	a	9076.7	120.792	102.2	139.39	0.4
2.5um_Platinum	Time to first pd from beginning of first probe	40	251.56	29364	4552.19	b	6403.79	6.43453	6.2055	6.6636	-0.05
12.5um_Gold	Time to first pd from beginning of first probe	22	1838	31338.1	8986.58	a	7195.44	7.14575	6.9511	7.3404	-0.05
2.5um_Platinum	Time to first E2 from start of first probe	38	1938.12	35099	14188.2	b	9995.44	104.719	93.8114	115.63	0.4
12.5um_Gold	Time to first E2 from start of first probe	14	4639.19	32577.5	19117.1	a	8033.29	123.566	111.02	136.11	0.4
2.5um_Platinum	Time to first E2 from start of that probe	38	438.42	4861.1	2258.72	a	1175.12	22.8754	21.6815	24.0692	0.25
12.5um_Gold	Time to first E2 from start of that probe	14	558.49	3222.06	1707.66	a	739.719	21.2673	19.6995	22.835	0.25
2.5um_Platinum	Time to first E2 from start of EPG	38	2110.28	36842.5	14627.9	b	10080.3	106.487	95.7958	117.18	0.4
12.5um_Gold	Time to first E2 from start of EPG	14	4705.23	32729.8	19501	a	8037.32	124.649	112.16	137.14	0.4
2.5um_Platinum	Time from beginning of EPG to first probe	40	0.5	2769.81	489.481	a	741.46	5.21475	4.7344	5.6951	0
12.5um_Gold	Time from beginning of EPG to first probe	23	57.09	16442	1154.52	a	3396.45	5.73587	5.1823	6.2894	0
2.5um_Platinum	Time to first sustained E2 from start of recording	36	2110.28	36842.5	14742.2	b	9510.05	155.485	138.52	172.45	0.45
12.5um_Gold	Time to first sustained E2 from start of recording	12	4705.23	38828.3	21341.7	a	10066.2	189.255	163.16	215.35	0.45
2.5um_Platinum	Time to first sustained E2 from start of first probe	36	1938.12	34293.3	14293.5	b	9367.41	223.133	195.72	250.55	0.5
12.5um_Gold	Time to first sustained E2 from start of first probe	12	4639.19	38631.3	20983.9	a	10051.6	279.127	236.61	321.64	0.5
2.5um_Platinum	Time to first sustained E2 from start of that probe	36	438.42	4603.69	2106.93	a	1084.93	28.8269	27.0434	30.6104	0.3
12.5um_Gold	Time to first sustained E2 from start of that probe	12	735.81	3222.06	1697.41	a	753.146	27.1337	24.7802	29.4871	0.3
2.5um_Platinum	Time to first sustained G from start of first probe	21	157.68	33139.1	8687.89	b	8708.77	115.119	90.4984	139.74	0.45
12.5um_Gold	Time to first sustained G from start of first probe	13	1291.58	31598.3	19056.2	a	9076.7	177.137	147.67	206.6	0.45
2.5um_Platinum	Time from Last E2 to end of EPG record	27	1177.02	40670.8	21534.9	b	12283.7	0.876194	0.6919	1.0604	1.35	Yes
12.5um_Gold	Time from Last E2 to end of EPG record	7	4245.62	20973.8	9417.28	a	5739.98	1.29562	1.1252	1.466	1.35	Yes
2.5um_Platinum	Time from end of last pd to end of EPG record	40	28.37	40839.4	15657.7	a	13738.1	0.461884	0.371	0.5528	0.1	Yes
12.5um_Gold	Time from end of last pd to end of EPG record	22	6.99	34960	10798.4	a	9538.97	0.387814	0.2955	0.4801	0.1	Yes
2.5um_Platinum	Time from start of EPG to 1st E	40	2088.93	39383.4	11790.5	b	10098.2	0.325503	0.2713	0.3797	-0.6	Yes
12.5um_Gold	Time from start of EPG to 1st E	15	4533.2	32715.2	18291.1	a	8145.1	0.449738	0.3962	0.5033	-0.6	Yes
2.5um_Platinum	Total duration of non-phloematic phase (recording duration minus total duration E1 and E2)	40	2490.9	43018.7	21872.7	b	12977.9	0.752541	0.6306	0.8745	0.95	Yes
12.5um_Gold	Total duration of non-phloematic phase (recording duration minus total duration E1 and E2)	15	20913.8	43118	34778.1	a	8064.78	1.13707	0.9964	1.2778	0.95	Yes
2.5um_Platinum	Total duration of C	40	1268	35409.4	12200.8	b	8351.78	0.439271	0.3791	0.4994	0	Yes
12.5um_Gold	Total duration of C	23	3843.05	31673.1	16567.6	a	6844	0.539748	0.4861	0.5934	0	Yes
2.5um_Platinum	Total duration of E	40	181.3	40709.1	21327.3	b	12977.9	0.752541	0.6306	0.8745	0.95	Yes
12.5um_Gold	Total duration of E	15	82	22286.2	8421.91	a	8064.78	1.13707	0.9964	1.2778	0.95	Yes
2.5um_Platinum	Total duration of E1	40	18.47	1021.36	206.775	a	227.597	0.265542	0.2333	0.2978	-1.3	Yes
12.5um_Gold	Total duration of E1	23	0	274.06	84.4704	b	84.3764	0.16025	0.1075	0.213	-1.3	Yes
2.5um_Platinum	Total duration of E1 followed by E2	38	13.8	499.17	89.8674	a	99.7952	0.198438	0.173	0.2239	-2.3	Yes
12.5um_Gold	Total duration of E1 followed by E2	14	25.97	205.68	94.1507	a	56.9638	0.222899	0.1924	0.2534	-2.3	Yes
2.5um_Platinum	Total Duration of E1 followed by a sustained E2	36	13.8	379.59	69.8858	a	69.2714	0.205043	0.1806	0.2295	-2.25	Yes
12.5um_Gold	Total Duration of E1 followed by a sustained E2	12	22.94	107.76	60.6842	a	33.9184	0.204482	0.1686	0.2404	-2.25	Yes
2.5um_Platinum	Total duration of E1 followed by E2 plus E2	38	363.84	40693.4	22322	b	12433.6	0.709074	0.5936	0.8245	0.9	Yes
12.5um_Gold	Total duration of E1 followed by E2 plus E2	14	192.27	22230.8	8978.85	a	8016.9	1.09432	0.9557	1.2329	0.9	Yes
2.5um_Platinum	Total Duration of E2	40	0	40670.8	21120.5	a	13092	0.627884	0.5356	0.7202	0.35	Yes
12.5um_Gold	Total Duration of E2	23	0	22165.8	5408.08	b	7590.44	0.226709	0.1232	0.3302	0.35	Yes
2.5um_Platinum	Total duration of F	40	0	12532.3	2295.09	b	3241.36	16.3325	12.3758	20.2892	0.25
12.5um_Gold	Total duration of F	23	142.01	12764.1	5713.82	a	4101.95	28.2969	24.8136	31.7802	0.25
2.5um_Platinum	Total duration of NP	40	260.03	13101.3	4143.58	b	3304.12	15.6219	14.6902	16.5536	0.15
12.5um_Gold	Total duration of NP	23	2424.54	38222.9	12645	a	9868.93	19.9121	18.6671	21.1572	0.15
2.5um_Platinum	Total duration of PD	40	28.75	1235.55	270.177	a	235.999	13.3786	12.0332	14.7241	0.3
12.5um_Gold	Total duration of PD	23	0	417.27	141.838	b	126.756	9.83639	7.8565	11.8163	0.3
2.5um_Platinum	Total duration of single E1	27	15.67	1007.56	169.91	a	212.359	0.188338	0.1555	0.2212	-2.45	Yes
12.5um_Gold	Total duration of single E1	9	29.57	122.48	69.4122	a	30.2366	0.157769	0.1346	0.1809	-2.45	Yes
2.5um_Platinum	Total probing time	40	30098.7	42940	39056.4	b	3304.12	33.0266	29.4508	36.6024	0.3
12.5um_Gold	Total probing time	23	4977.07	40775.5	30555	a	9868.93	49.8052	44.6326	54.9777	0.3
2.5um_Platinum	Duration of longest E2	38	278.21	40670.8	19704.9	a	12616.3	0.569197	0.4903	0.6481	0.15	Yes
12.5um_Gold	Duration of longest E2	14	105.23	20973.8	6030.87	b	5683.89	0.292296	0.2014	0.3832	0.15	Yes
2.5um_Platinum	Mean duration of F	29	60.88	2991.34	1159.67	a	802.128	61.5455	52.2116	70.8794	0.5
12.5um_Gold	Mean duration of F	23	71.005	3162.05	1094.29	a	699.905	60.6123	51.4193	69.8053	0.5
2.5um_Platinum	Mean number of G per probe	22	0.0434783	0.631579	0.159583	a	0.136844	0.0912211	0.07383	0.1086	-5
12.5um_Gold	Mean number of G per probe	13	0.00900901	0.0615385	0.0286925	b	0.0154065	0.025849	0.01866	0.03304	-5
2.5um_Platinum	Mean number of pd per probe	40	0.5	6.6	2.9484	a	1.63309	1.01793	0.9317	1.1042	-0.35
12.5um_Gold	Mean number of pd per probe	22	0.003663	1.28205	0.463831	b	0.408595	0.314174	0.2123	0.416	-0.35
2.5um_Platinum	Mean duration of pd	40	3.99811	8.78158	6.0477	a	1.08181	1.19113	1.1749	1.2074	-0.55
12.5um_Gold	Mean duration of pd	22	3.635	11.255	6.37199	a	1.68262	1.2001	1.1686	1.2316	-0.55
2.5um_Platinum	Standard Deviation of duration of C	40	71.0131	384.775	150.38	a	75.1969	3.88126	3.7991	3.9635	-0.1
12.5um_Gold	Standard Deviation of duration of C	23	37.9661	479.536	192.153	a	108.026	3.99171	3.8429	4.1405	-0.1
2.5um_Platinum	Standard Deviation of duration of E1	31	2.22739	390.72	38.6265	a	70.1706	2.19698	1.9839	2.4101	-0.2
12.5um_Gold	Standard Deviation of duration of E1	14	3.28553	105.543	23.4528	a	27.3347	2.08607	1.8079	2.3642	-0.2
2.5um_Platinum	Standard Deviation of duration of E2	23	43.9043	22408.7	7358.84	a	6836.24	39.3148	32.5322	46.0975	0.3	Yes
12.5um_Gold	Standard Deviation of duration of E2	12	21.4183	14798.5	2874.37	b	3975.54	27.5748	19.6658	35.4837	0.3	Yes
2.5um_Platinum	Standard Deviation of duration of F	15	91.3653	2456.36	1111.76	a	627.259	80.3779	65.0854	95.6703	0.55
12.5um_Gold	Standard Deviation of duration of F	21	20.0606	2744.87	966.459	a	709.785	72.4865	58.028	86.9451	0.55
2.5um_Platinum	Standard Deviation of duration of G	16	141.153	7036.57	1679	a	1716.37	8.37411	7.6006	9.1477	0.05
12.5um_Gold	Standard Deviation of duration of G	7	304.722	6311.22	1776.42	a	2144.75	8.32701	7.0777	9.5763	0.05
2.5um_Platinum	Standard Deviation of duration of NP	40	54.9366	3507.28	369.662	a	592.938	2.19256	2.1607	2.2244	-0.4
12.5um_Gold	Standard Deviation of duration of NP	23	88.0254	3177.3	512.813	a	854.024	2.21796	2.1824	2.2535	-0.4
2.5um_Platinum	Standard Deviation of duration of Probes	40	1632.43	24746.4	7719.3	a	6050.66	17.9225	16.9909	18.8541	0.15
12.5um_Gold	Standard Deviation of duration of Probes	23	56.7823	4515.93	1466.05	b	1185.26	12.3107	11.1453	13.476	0.15
